# Supplementary material
Source: publisher figshare collection journal article supplement (https://gsajournals.figshare.com/ndownloader/files/23268710)
Supplement: Supplementary file 1 [file 23268710]

## Sheet: Sheet1
Table S1. NIL data on donor parent designation, introgression start and end points, type of introgression (heterozygous, homozygous or both) and designation with regards to resistance or susceptibility to NLB in comparison to the recurrent parent, B73.
NIL accession	original pedigree	original donor introgression†	verified donor	chr	chr start	chr end	Introgression	NLB
10NN0001	CML103/B73 NIL-1001	1	CML103	3	189360361	214830063	homozygous	susceptible
10NN0001	CML103/B73 NIL-1001	2	CML103	6	85797434	102755820	homozygous	susceptible
10NN0003	CML103/B73 NIL-1003	3	CML103	1	286511821	290934617	homozygous	ns
10NN0003	CML103/B73 NIL-1003	3	CML103	1	290934617	292874953	heterozygous	ns
10NN0003	CML103/B73 NIL-1003	3	CML103	1	292874953	298749654	homozygous	ns
10NN0005	CML103/B73 NIL-1005	4	Tzi8	7	161290486	172944555	homozygous	ns
10NN0007	CML103/B73 NIL-1008	5	CML103	1	62675432	195754293	homozygous	resistant
10NN0007	CML103/B73 NIL-1008	6	CML103	1	203720113	206062036	heterozygous	resistant
10NN0007	CML103/B73 NIL-1008	7	CML103	1	206062036	263055631	homozygous	resistant
10NN0007	CML103/B73 NIL-1008	8	CML103	7	171776463	174585210	homozygous	resistant
10NN0007	CML103/B73 NIL-1008	9	CML103	10	138212666	139839053	heterozygous	resistant
10NN0007	CML103/B73 NIL-1008	9	CML103	10	139839053	142845963	homozygous	resistant
10NN0009	CML103/B73 NIL-1015	10	CML103	7	14658292	134010341	homozygous	susceptible
10NN0011	CML103/B73 NIL-1016	11	Tzi8	1	47812870	53663024	homozygous	ns
10NN0011	CML103/B73 NIL-1016	12	Tzi8	7	117373586	148463448	homozygous	ns
10NN0013	CML103/B73 NIL-1020	13	CML103	4	11815037	14722463	homozygous	ns
10NN0013	CML103/B73 NIL-1020	14	CML103	6	96900841	112007595	homozygous	ns
10NN0013	CML103/B73 NIL-1020	15	CML103	9	89452398	105419769	homozygous	ns
10NN0015	CML103/B73 NIL-1027	16	Tzi8	2	4344157	10543954	heterozygous	susceptible
10NN0015	CML103/B73 NIL-1027	17	Tzi8	2	10543954	13785606	homozygous	susceptible
10NN0015	CML103/B73 NIL-1027	18	Tzi8	2	196537211	213951629	homozygous	susceptible
10NN0015	CML103/B73 NIL-1027	18	Tzi8	5	183872877	186508642	homozygous	susceptible
10NN0017	CML103/B73 NIL-1052	19	CML103	3	169243492	180318444	homozygous	ns
10NN0019	CML103/B73 NIL-1078	20	Tzi8	3	213419744	226806294	homozygous	ns
10NN0019	CML103/B73 NIL-1078	20	Tzi8	3	226806294	229085083	heterozygous	ns
10NN0019	CML103/B73 NIL-1078	20	Tzi8	3	229085083	232019477	homozygous	ns
10NN0019	CML103/B73 NIL-1078	21	Tzi8	5	6568968	9825482	heterozygous	ns
10NN0021	CML103/B73 NIL-1082	22	CML103	3	213419744	216232703	heterozygous	ns
10NN0021	CML103/B73 NIL-1082	23	CML103	4	237589553	239094859	heterozygous	ns
10NN0021	CML103/B73 NIL-1082	24	CML103	5	6568268	47822346	homozygous	ns
10NN0021	CML103/B73 NIL-1082	24	CML103	5	175608804	200650740	homozygous	ns
10NN0023	CML103/B73 NIL-1098	24	Tzi8	1	207646652	210484710	homozygous	ns
10NN0023	CML103/B73 NIL-1098	25	Tzi8	4	178750970	202103850	homozygous	ns
10NN0023	CML103/B73 NIL-1098		Tzi8	5	0	2128446	homozygous	ns
10NN0023	CML103/B73 NIL-1098	26, 27, 28, 29, 30	Tzi8	8	17067757	133443243	homozygous	ns
10NN0025	CML103/B73 NIL-1100	31	Tzi8	4	177648698	191565289	homozygous	ns
10NN0025	CML103/B73 NIL-1100	32,33,34	Tzi8	8	16775906	78638689	heterozygous	ns
10NN0025	CML103/B73 NIL-1100	35	Tzi8	8	83795739	91861477	heterozygous	ns
10NN0025	CML103/B73 NIL-1100		Tzi8	8	103633113	106749989	heterozygous	ns
10NN0025	CML103/B73 NIL-1100		Tzi8	8	117863053	121485492	heterozygous	ns
10NN0027	CML103/B73 NIL-1153	36	CML103	1	214892845	231725351	homozygous	susceptible
10NN0027	CML103/B73 NIL-1153	37	CML103	6	162692916	164867354	homozygous	susceptible
10NN0031	CML103/B73 NIL-1171	38	CML103	2	218909150	224125350	homozygous	ns
10NN0031	CML103/B73 NIL-1171		CML103	4	175127160	177062150	homozygous	ns
10NN0031	CML103/B73 NIL-1171	39	CML103	9	2486681	7868732	homozygous	ns
10NN0033	CML103/B73 NIL-1210	40	Tzi8	1	236240900	265451386	homozygous	susceptible
10NN0033	CML103/B73 NIL-1210	41	Tzi8	6	163950097	169082784	homozygous	susceptible
10NN0033	CML103/B73 NIL-1210	42	Tzi8	7	15157805	125404979	homozygous	susceptible
10NN0033	CML103/B73 NIL-1210	43	Tzi8	7	171343140	176524195	homozygous	susceptible
10NN0035	CML103/B73 NIL-1218	44	CML103	1	45505827	50951691	homozygous	ns
10NN0035	CML103/B73 NIL-1218	45	CML103	4	173712402	177587050	heterozygous	ns
10NN0035	CML103/B73 NIL-1218	46	CML103	4	177587050	181890370	homozygous	ns
10NN0035	CML103/B73 NIL-1218	47	CML103	6	160133741	162111342	homozygous	ns
10NN0037	CML103/B73 NIL-1224	48	Tzi8	1	279899215	283249876	homozygous	ns
10NN0037	CML103/B73 NIL-1224	48	Tzi8	1	283249876	300994469	heterozygous	ns
10NN0037	CML103/B73 NIL-1224	49,50	Tzi8	3	134682499	136326043	heterozygous	ns
10NN0037	CML103/B73 NIL-1224		Tzi8	3	136326043	175693584	homozygous	ns
10NN0039	CML103/B73 NIL-1233	51	CML103	3	11210103	19667512	heterozygous	ns
10NN0039	CML103/B73 NIL-1233	52	CML103	5	88661223	164341204	homozygous	ns
10NN0041	CML103/B73 NIL-1282	53	CML103	1	296962012	298688110	homozygous	ns
10NN0041	CML103/B73 NIL-1282	53	CML103	1	298688110	301072724	heterozygous	ns
10NN0043	CML103/B73 NIL-1288	54	Tzi8	3	183385509	187432536	homozygous	ns
10NN0043	CML103/B73 NIL-1288	55	Tzi8	6	160037667	162690511	homozygous	ns
10NN0045	CML103/B73 NIL-1306		CML103	1	200003579	202160421	homozygous	ns
10NN0045	CML103/B73 NIL-1306	56	CML103	4	142584787	180445929	homozygous	ns
10NN0047	CML103/B73 NIL-1324	57	Mo17	6	133654311	135995113	heterozygous	ns
10NN0047	CML103/B73 NIL-1324	58	Mo17	6	144280141	146614370	heterozygous	ns
10NN0047	CML103/B73 NIL-1324	59,60	Mo17	10	605251	86425929	heterozygous	ns
10NN0049	CML103/B73 NIL-1327	61	CML103	3	220026924	222569072	heterozygous	ns
10NN0049	CML103/B73 NIL-1327	62	CML103	3	222569072	226819519	homozygous	ns
10NN0049	CML103/B73 NIL-1327	63	CML103	8	8280055	13175142	homozygous	ns
10NN0049	CML103/B73 NIL-1327	64	CML103	8	21816015	145842671	homozygous	ns
10NN0051	CML103/B73 NIL-1330	65	CML103	1	296962012	301072724	homozygous	ns
10NN0051	CML103/B73 NIL-1330	66	CML103	6	89066163	90955246	heterozygous	ns
10NN0051	CML103/B73 NIL-1330	67	CML103	8	0	13339324	homozygous	ns
10NN0051	CML103/B73 NIL-1330	68	CML103	8	21615671	145842587	homozygous	ns
10NN0053	CML103/B73 NIL-1331	69	CML103	6	83430389	89124951	homozygous	ns
10NN0053	CML103/B73 NIL-1331	70	CML103	7	135506347	140007975	homozygous	ns
10NN0055	CML103/B73 NIL-1345	71	CML103	5	204605144	208094384	homozygous	ns
10NN0055	CML103/B73 NIL-1345	72	CML103	8	0	14603753	homozygous	ns
10NN0057	CML228/B73 NIL-1006	75	CML103	1	4592990	16043765	homozygous	ns
10NN0057	CML228/B73 NIL-1006	76	CML103	1	87982420	90105799	heterozygous	ns
10NN0057	CML228/B73 NIL-1006	77,78	CML103	1	90105799	195187249	homozygous	ns
10NN0059	CML228/B73 NIL-1023		CML103	5	167276918	169820633	homozygous	ns
10NN0059	CML228/B73 NIL-1023	79,80	CML103	6	132261037	160034454	homozygous	ns
10NN0059	CML228/B73 NIL-1023		CML103	10	142718448	145664493	heterozygous	ns
10NN0061	CML228/B73 NIL-1028	81	CML228	1	258396344	262546460	homozygous	ns
10NN0065	CML228/B73 NIL-1041	82	CML228	1	191004957	217641468	homozygous	resistant
10NN0065	CML228/B73 NIL-1041	83, 84	CML228	1	217641468	243462783	heterozygous	ns
10NN0067	CML228/B73 NIL-1045	85	CML228	1	290718950	293578038	heterozygous	ns
10NN0067	CML228/B73 NIL-1045	85	CML228	1	293578038	300925689	homozygous	ns
10NN0067	CML228/B73 NIL-1045	86	CML228	4	151656449	155017321	homozygous	ns
10NN0069	CML228/B73 NIL-1049		CML228	3	220845598	222732367	heterozygous	ns
10NN0069	CML228/B73 NIL-1049	87	CML228	3	224932561	226823218	homozygous	ns
10NN0069	CML228/B73 NIL-1049	87	CML228	3	226823218	229586945	heterozygous	ns
10NN0069	CML228/B73 NIL-1049	88	CML228	4	28983822	143865336	homozygous	ns
10NN0071	CML228/B73 NIL-1068	89	CML228	1	208954801	222403118	homozygous	ns
10NN0071	CML228/B73 NIL-1068	90	CML228	6	115953328	132237668	homozygous	ns
10NN0071	CML228/B73 NIL-1068	91	CML228	6	132237668	156522563	heterozygous	ns
10NN0073	CML228/B73 NIL-1077	92	CML228	1	211594296	223626468	homozygous	ns
10NN0073	CML228/B73 NIL-1077	93	CML228	3	13280581	189774556	homozygous	ns
10NN0075	CML228/B73 NIL-1085	94	CML228	4	171671836	200185395	homozygous	ns
10NN0077	CML228/B73 NIL-1087	95	CML228	3	30126785	149563817	homozygous	ns
10NN0077	CML228/B73 NIL-1087	96	CML228	3	220292923	224486787	homozygous	ns
10NN0079	CML228/B73 NIL-1102	97	CML228	1	207722679	227559378	homozygous	ns
10NN0079	CML228/B73 NIL-1102	98	CML228	3	8300032	15230057	homozygous	ns
10NN0079	CML228/B73 NIL-1102	99	CML228	3	15230057	19776191	heterozygous	ns
10NN0079	CML228/B73 NIL-1102	100	CML228	3	19776191	48102147	homozygous	ns
10NN0081	CML228/B73 NIL-1110	101	CML228	3	218835245	227087300	homozygous	ns
10NN0081	CML228/B73 NIL-1110	102	CML228	7	144097986	155742149	homozygous	ns
10NN0081	CML228/B73 NIL-1110	103	CML228	9	0	3312436	homozygous	ns
10NN0085	CML228/B73 NIL-1118	104	CML228	8	110687497	148200518	homozygous	ns
10NN0087	CML228/B73 NIL-1128	105	CML228	2	233400974	236974123	homozygous	ns
10NN0087	CML228/B73 NIL-1128	106	CML228	8	110089425	148135461	homozygous	ns
10NN0087	CML228/B73 NIL-1128	107	CML228	9	0	7662043	homozygous	ns
10NN0089	CML228/B73 NIL-1134		CML228	2	202729042	203634042	heterozygous	resistant
10NN0089	CML228/B73 NIL-1134		CML228	2	203634042	204025213	homozygous	resistant
10NN0091	CML228/B73 NIL-1142	108	CML228	1	12851178	36222121	homozygous	susceptible
10NN0091	CML228/B73 NIL-1142	109	CML228	7	174549340	176521445	homozygous	susceptible
10NN0091	CML228/B73 NIL-1142	110	CML228	9	0	1731452	heterozygous	susceptible
10NN0093	CML228/B73 NIL-1143	111	CML247	1	8451871	19252635	homozygous	ns
10NN0093	CML228/B73 NIL-1143	111	CML247	1	19252635	21473288	heterozygous	ns
10NN0093	CML228/B73 NIL-1143	112	CML247	3	150034125	176551097	homozygous	ns
10NN0093	CML228/B73 NIL-1143		CML247	5	0	2111217	homozygous	ns
10NN0095	CML228/B73 NIL-1179		CML228	1	92787114	95440419	heterozygous	ns
10NN0095	CML228/B73 NIL-1179	113	CML228	5	33298309	54415955	homozygous	ns
10NN0095	CML228/B73 NIL-1179	113	CML228	5	54415955	56477849	heterozygous	ns
10NN0095	CML228/B73 NIL-1179	114	CML228	5	58909808	69303779	homozygous	ns
10NN0095	CML228/B73 NIL-1179	115	CML228	7	163824085	168293814	homozygous	ns
10NN0095	CML228/B73 NIL-1179	116	CML228	9	117323949	121732100	heterozygous	ns
10NN0095	CML228/B73 NIL-1179	117	CML228	10	145105227	146687494	homozygous	ns
10NN0097	CML228/B73 NIL-1214	118	CML103	3	220747581	225349072	homozygous	ns
10NN0097	CML228/B73 NIL-1214	119	CML103	8	0	4409026	homozygous	ns
10NN0097	CML228/B73 NIL-1214	120121122	CML103	8	24346566	145842587	homozygous	ns
10NN0099	CML228/B73 NIL-1215	123	CML228	6	162722219	169102724	homozygous	ns
10NN0099	CML228/B73 NIL-1215	124	CML228	7	161436268	165360077	homozygous	ns
10NN0099	CML228/B73 NIL-1215	125	CML228	10	14446212	25568458	homozygous	ns
10NN0099	CML228/B73 NIL-1215	126	CML228	10	25568458	82721135	heterozygous	ns
10NN0099	CML228/B73 NIL-1215	127	CML228	10	82721135	87132368	homozygous	ns
10NN0101	CML228/B73 NIL-1230	128	CML228	2	216684095	221965383	heterozygous	ns
10NN0101	CML228/B73 NIL-1230	129	CML228	2	221965383	230942106	homozygous	ns
10NN0101	CML228/B73 NIL-1230	130	CML228	3	151578010	159676137	homozygous	ns
10NN0101	CML228/B73 NIL-1230	131	CML228	7	17522066	112936980	homozygous	ns
10NN0103	CML228/B73 NIL-1231	132	CML228	7	17768964	112786017	homozygous	ns
10NN0105	CML247/B73 NIL-1002	133	CML228	1	195181296	226258038	homozygous	susceptible
10NN0105	CML247/B73 NIL-1002	134	CML228	8	0	2990829	homozygous	susceptible
10NN0105	CML247/B73 NIL-1002	135	CML228	9	3312808	7959566	homozygous	susceptible
10NN0107	CML247/B73 NIL-1018	136	CML228	1	175897733	179834341	homozygous	ns
10NN0107	CML247/B73 NIL-1018	137	CML228	8	169491676	171812119	homozygous	ns
10NN0109	CML247/B73 NIL-1024	138	CML247	3	22570785	175701311	homozygous	susceptible
10NN0111	CML247/B73 NIL-1024	139	CML247	7	173553987	176524195	homozygous	ns
10NN0111	CML247/B73 NIL-1024	140	CML247	8	171775145	175698250	homozygous	ns
10NN0113	CML247/B73 NIL-1027	141	CML247	1	264515627	275038022	heterozygous	ns
10NN0113	CML247/B73 NIL-1027	142	CML247	5	18152784	63828374	heterozygous	ns
10NN0115	CML247/B73 NIL-1045	143	CML247	1	270990051	276817418	heterozygous	ns
10NN0115	CML247/B73 NIL-1045	144	CML247	1	278359053	285125030	homozygous	ns
10NN0115	CML247/B73 NIL-1045	145	CML247	5	13802687	15772892	heterozygous	ns
10NN0115	CML247/B73 NIL-1045	145	CML247	5	15772892	62604316	homozygous	ns
10NN0117	CML247/B73 NIL-1073	146	CML247	1	297976740	300994469	homozygous	ns
10NN0117	CML247/B73 NIL-1073		CML247	5	215927135	217748247	homozygous	ns
10NN0119	CML247/B73 NIL-1080	147	CML247	2	199547216	212517254	homozygous	ns
10NN0119	CML247/B73 NIL-1080	148	CML247	7	47966818	127970707	homozygous	ns
10NN0121	CML247/B73 NIL-1086	149	CML247	3	195049569	199253226	homozygous	resistant
10NN0121	CML247/B73 NIL-1086	150	CML247	3	199253226	204586799	heterozygous	resistant
10NN0121	CML247/B73 NIL-1086	151	CML247	3	204586799	207988904	homozygous	resistant
10NN0121	CML247/B73 NIL-1086	152	CML247	6	129841718	143026152	homozygous	resistant
10NN0121	CML247/B73 NIL-1086	153	CML247	7	22005457	129230076	homozygous	resistant
10NN0123	CML247/B73 NIL-1130	154	CML247	2	206051384	212641200	homozygous	ns
10NN0125	CML247/B73 NIL-1137	155	CML247	1	288733135	296651278	homozygous	susceptible
10NN0125	CML247/B73 NIL-1137	156	CML247	9	15601658	21965165	homozygous	susceptible
10NN0127	CML247/B73 NIL-1140	157	CML247	6	149089325	164309138	homozygous	ns
10NN0127	CML247/B73 NIL-1140	158	CML247	9	154378486	156412412	heterozygous	ns
10NN0129	CML247/B73 NIL-1141	159	CML247	3	210977709	226823081	homozygous	ns
10NN0133	CML247/B73 NIL-1159	160	CML247	1	14039354	29788910	homozygous	ns
10NN0135	CML247/B73 NIL-1165	161	CML247	5	203687939	208072187	homozygous	ns
10NN0137	CML247/B73 NIL-1185	162	CML247	3	200596344	206609034	homozygous	susceptible
10NN0137	CML247/B73 NIL-1185	163	CML247	4	0	3600858	heterozygous	susceptible
10NN0137	CML247/B73 NIL-1185	164	CML247	4	3600858	11466430	homozygous	susceptible
10NN0137	CML247/B73 NIL-1185		CML247	4	11466430	12975769	heterozygous	susceptible
10NN0139	CML247/B73 NIL-1197	165	CML247	3	4708402	9803137	heterozygous	ns
10NN0139	CML247/B73 NIL-1197	166	CML247	3	9803137	15040754	homozygous	ns
10NN0139	CML247/B73 NIL-1197	166	CML247	3	15040754	17285351	heterozygous	ns
10NN0139	CML247/B73 NIL-1197	166	CML247	3	17285351	19940386	homozygous	ns
10NN0139	CML247/B73 NIL-1197	167	CML247	3	154074481	156537414	heterozygous	ns
10NN0139	CML247/B73 NIL-1197	168	CML247	3	156537414	161644442	homozygous	ns
10NN0143	CML247/B73 NIL-1208	169	CML247	8	101873172	145140391	homozygous	ns
10NN0145	CML247/B73 NIL-1223	170	CML247	6	119396887	122889678	heterozygous	ns
10NN0147	CML247/B73 NIL-1224	171	CML52	1	291654535	301170541	homozygous	ns
10NN0147	CML247/B73 NIL-1224	172	CML52	7	151845939	156569508	homozygous	ns
10NN0149	CML247/B73 NIL-1253	173	CML247	3	137246834	149564281	homozygous	ns
10NN0149	CML247/B73 NIL-1253	174	CML247	3	149564281	154074481	heterozygous	ns
10NN0149	CML247/B73 NIL-1253	175	CML247	3	154074481	166153777	homozygous	ns
10NN0149	CML247/B73 NIL-1253	176	CML247	7	92258692	100477082	homozygous	ns
10NN0149	CML247/B73 NIL-1253	177	CML247	7	100477082	104755051	heterozygous	ns
10NN0151	CML277/B73 NIL-1008	178	CML247	3	137246834	155792496	homozygous	ns
10NN0151	CML277/B73 NIL-1008	178	CML247	3	155792496	160667450	heterozygous	ns
10NN0151	CML277/B73 NIL-1008	178	CML247	3	160667450	179809077	homozygous	ns
10NN0151	CML277/B73 NIL-1008	179	CML247	4	185735999	191950792	homozygous	ns
10NN0151	CML277/B73 NIL-1008	180	CML247	7	15328516	17693563	homozygous	ns
10NN0151	CML277/B73 NIL-1008	181	CML247	9	24063664	39365185	homozygous	ns
10NN0151	CML277/B73 NIL-1008	182	CML247	9	39365185	42836409	heterozygous	ns
10NN0151	CML277/B73 NIL-1008	183	CML247	9	42836409	101390387	homozygous	ns
10NN0155	CML277/B73 NIL-1032	184	CML322	2	8951923	16870108	homozygous	ns
10NN0157	CML277/B73 NIL-1035	185	CML277	3	19655685	32111283	homozygous	ns
10NN0157	CML277/B73 NIL-1035	186	CML277	3	32111283	34948388	heterozygous	ns
10NN0157	CML277/B73 NIL-1035	187	CML277	3	34948388	124922108	homozygous	ns
10NN0157	CML277/B73 NIL-1035	188	CML277	3	124922108	127544834	heterozygous	ns
10NN0157	CML277/B73 NIL-1035	189	CML277	3	127544834	170457209	homozygous	ns
10NN0157	CML277/B73 NIL-1035	190	CML277	5	0	3845339	homozygous	ns
10NN0157	CML277/B73 NIL-1035	191	CML277	9	137734669	139757000	heterozygous	ns
10NN0159	CML277/B73 NIL-1049	192	CML277	3	8303017	13390001	homozygous	ns
10NN0159	CML277/B73 NIL-1049	193	CML277	3	176262128	179244793	homozygous	ns
10NN0161	CML277/B73 NIL-1054	194	CML277	7	84958016	129723328	homozygous	ns
10NN0161	CML277/B73 NIL-1054	195	CML277	7	153219178	160596960	homozygous	ns
10NN0161	CML277/B73 NIL-1054	196	CML277	10	117570349	126879783	heterozygous	ns
10NN0163	CML277/B73 NIL-1054	197	CML322	1	291866019	301170541	homozygous	ns
10NN0163	CML277/B73 NIL-1054	198	CML322	10	132553002	136117533	homozygous	ns
10NN0165	CML277/B73 NIL-1057		CML277	1	290305043	292929456	homozygous	susceptible
10NN0165	CML277/B73 NIL-1057	199	CML277	3	19966887	134790342	homozygous	susceptible
10NN0167	CML277/B73 NIL-1069		CML277	1	290306123	292929456	homozygous	ns
10NN0167	CML277/B73 NIL-1069	200	CML277	3	19930073	134792075	homozygous	ns
10NN0171	CML277/B73 NIL-1092	201	CML322	1	273336566	289847169	homozygous	ns
10NN0171	CML277/B73 NIL-1092		CML322	1	289847169	291924598	heterozygous	ns
10NN0171	CML277/B73 NIL-1092	202	CML322	2	219022778	236974123	homozygous	ns
10NN0173	CML277/B73 NIL-1094	203	CML277	1	179886153	237178812	homozygous	resistant
10NN0175	CML277/B73 NIL-1108	204	CML277	3	219827927	224123108	heterozygous	ns
10NN0175	CML277/B73 NIL-1108	205	CML277	8	21865352	99169957	homozygous	ns
10NN0175	CML277/B73 NIL-1108	206	CML277	8	99169957	106271165	heterozygous	ns
10NN0175	CML277/B73 NIL-1108	207	CML277	8	106271165	110242633	homozygous	ns
10NN0175	CML277/B73 NIL-1108	208	CML277	10	93000527	101032252	homozygous	ns
10NN0177	CML277/B73 NIL-1131	209	CML277	1	3468972	16043765	homozygous	ns
10NN0177	CML277/B73 NIL-1131	210	CML277	10	97734676	101032252	homozygous	ns
10NN0179	CML277/B73 NIL-1132		CML277	1	290718974	293134304	heterozygous	ns
10NN0179	CML277/B73 NIL-1132	211	CML277	4	148398914	173181416	homozygous	ns
10NN0179	CML277/B73 NIL-1132		CML277	5	210879154	213051844	homozygous	ns
10NN0179	CML277/B73 NIL-1132	212	CML277	9	109889105	139584579	homozygous	ns
10NN0181	CML277/B73 NIL-1181	213	CML277	5	175600483	180226553	homozygous	ns
10NN0181	CML277/B73 NIL-1181	214	CML277	5	180226553	186876244	heterozygous	ns
10NN0181	CML277/B73 NIL-1181	215	CML277	6	108066102	129963687	homozygous	ns
10NN0181	CML277/B73 NIL-1181	216	CML277	6	129963687	141611766	heterozygous	ns
10NN0181	CML277/B73 NIL-1181	217	CML277	8	26101212	69054564	homozygous	ns
10NN0181	CML277/B73 NIL-1181	218	CML277	8	125392787	146181694	homozygous	ns
10NN0185	CML277/B73 NIL-1283	219	CML277	7	8048336	100239525	homozygous	ns
10NN0187	CML277/B73 NIL-1300	220	CML277	1	24602373	39902089	homozygous	ns
10NN0189	CML277/B73 NIL-1310	221	CML277	1	241470931	249307277	homozygous	resistant
10NN0189	CML277/B73 NIL-1310	222	CML277	1	249307277	253303083	heterozygous	resistant
10NN0189	CML277/B73 NIL-1310	223	CML277	2	213580845	223943207	homozygous	resistant
10NN0189	CML277/B73 NIL-1310	224	CML277	8	18446816	102454425	homozygous	resistant
10NN0189	CML277/B73 NIL-1310	225	CML277	9	107790867	119311677	heterozygous	resistant
10NN0189	CML277/B73 NIL-1310	226	CML277	9	119311677	143887771	homozygous	resistant
10NN0191	CML277/B73 NIL-1310	227	CML322	1	240866296	291101594	homozygous	ns
10NN0191	CML277/B73 NIL-1310		CML322	2	225833817	229009532	heterozygous	ns
10NN0191	CML277/B73 NIL-1310		CML322	8	1749357	5134779	heterozygous	ns
10NN0193	CML322/B73 NIL-1004	228	CML277	5	184227425	207514298	homozygous	susceptible
10NN0195	CML322/B73 NIL-1018	229	CML277	5	10104035	13411905	homozygous	susceptible
10NN0195	CML322/B73 NIL-1018	230	CML277	5	184234298	207514715	homozygous	susceptible
10NN0197	CML322/B73 NIL-1060	231	CML322	7	38837074	161902995	homozygous	ns
10NN0199	CML322/B73 NIL-1062	232	CML322	1	51894950	57892097	heterozygous	ns
10NN0199	CML322/B73 NIL-1062	233	CML322	1	57892097	179587367	homozygous	ns
10NN0199	CML322/B73 NIL-1062	234	CML322	3	32128281	172372708	homozygous	ns
10NN0199	CML322/B73 NIL-1062	235	CML322	4	6598081	23260079	homozygous	ns
10NN0199	CML322/B73 NIL-1062	236	CML322	9	0	1893403	homozygous	ns
10NN0201	CML322/B73 NIL-1091	237	CML322	4	11647026	16844873	homozygous	susceptible
10NN0201	CML322/B73 NIL-1091	238	CML322	5	174351745	198036047	homozygous	susceptible
10NN0205	CML322/B73 NIL-1103	239	CML322	1	52161960	59598072	homozygous	susceptible
10NN0205	CML322/B73 NIL-1103	240	CML322	3	20307824	146647593	homozygous	susceptible
10NN0205	CML322/B73 NIL-1103	241	CML322	3	155763335	169734766	homozygous	susceptible
10NN0205	CML322/B73 NIL-1103	242	CML322	4	28117299	37730996	heterozygous	susceptible
10NN0207	CML322/B73 NIL-1137	243	CML322	2	2632587	4206728	heterozygous	susceptible
10NN0207	CML322/B73 NIL-1137	243	CML322	2	4206728	12136857	homozygous	susceptible
10NN0209	CML322/B73 NIL-1183	244	CML322	1	178424159	212522503	homozygous	ns
10NN0209	CML322/B73 NIL-1183	245	CML322	1	292533904	296708813	homozygous	ns
10NN0209	CML322/B73 NIL-1183	246	CML322	4	17332732	33126174	heterozygous	ns
10NN0211	CML322/B73 NIL-1183	247	CML322	4	152430494	166865541	homozygous	ns
10NN0215	CML322/B73 NIL-1194	248	CML322	6	156831274	164586768	homozygous	ns
10NN0219	CML322/B73 NIL-1211	249	CML322	3	165735312	170127405	heterozygous	susceptible
10NN0219	CML322/B73 NIL-1211	250	CML322	3	170127405	172672757	homozygous	susceptible
10NN0219	CML322/B73 NIL-1211	251	CML322	3	172672757	181651854	heterozygous	susceptible
10NN0219	CML322/B73 NIL-1211	252	CML322	7	133075852	141513062	heterozygous	susceptible
10NN0221	CML322/B73 NIL-1214	253	CML322	1	292276703	301170541	homozygous	ns
10NN0223	CML322/B73 NIL-1218	254	CML322	7	172881124	176524195	homozygous	susceptible
10NN0225	CML322/B73 NIL-1224	255	CML322	5	210274188	212613339	homozygous	ns
10NN0225	CML322/B73 NIL-1224	256	CML322	8	16747266	34703065	homozygous	ns
10NN0227	CML322/B73 NIL-1247	257	CML322	4	188200795	217596345	homozygous	ns
10NN0227	CML322/B73 NIL-1247	257	CML322	4	217596345	219604042	heterozygous	ns
10NN0229	CML322/B73 NIL-1250	258	CML322	3	215932309	224485290	homozygous	ns
10NN0231	CML322/B73 NIL-1255	259	CML322	3	10067424	12426539	homozygous	susceptible
10NN0233	CML322/B73 NIL-1256	260	CML322	1	290449094	290687110	heterozygous	ns
10NN0237	CML333/B73 NIL-1001	261	CML322	1	8628158	16050368	homozygous	ns
10NN0237	CML333/B73 NIL-1001	262, 263, 264	CML322	5	13138180	68873928	homozygous	ns
10NN0239	CML333/B73 NIL-1029	265	CML322	7	140007924	157433014	homozygous	susceptible
10NN0239	CML333/B73 NIL-1029	266	CML322	10	6373053	10614931	homozygous	susceptible
10NN0239	CML333/B73 NIL-1029	267	CML322	10	93000527	99957462	homozygous	susceptible
10NN0239	CML333/B73 NIL-1029	267	CML322	10	99957462	134601466	heterozygous	susceptible
10NN0239	CML333/B73 NIL-1029	267	CML322	10	134601466	145473998	homozygous	susceptible
10NN0241	CML333/B73 NIL-1036	268	CML333	1	295315911	300925689	homozygous	ns
10NN0243	CML333/B73 NIL-1047	269	CML333	1	82189595	93908748	homozygous	ns
10NN0243	CML333/B73 NIL-1047	270	CML333	4	3759108	9658116	homozygous	ns
10NN0243	CML333/B73 NIL-1047	271	CML333	7	130706512	152451816	homozygous	ns
10NN0247	CML333/B73 NIL-1097	272	CML333	7	9903985	21638749	homozygous	ns
10NN0247	CML333/B73 NIL-1097	273	CML333	7	100240572	140007969	homozygous	ns
10NN0249	CML333/B73 NIL-1109	274	CML333	3	4876194	129045853	homozygous	ns
10NN0251	CML333/B73 NIL-1115	275	CML333	2	168456636	170267155	heterozygous	ns
10NN0251	CML333/B73 NIL-1115	275	CML333	2	170267155	173832776	homozygous	ns
10NN0251	CML333/B73 NIL-1115	276	CML333	7	142904226	166545763	homozygous	ns
10NN0253	CML333/B73 NIL-1124	277	CML333	7	7259159	11476328	homozygous	ns
10NN0253	CML333/B73 NIL-1124	278	CML333	7	11476328	83433568	heterozygous	ns
10NN0253	CML333/B73 NIL-1124	279	CML333	7	83433568	100035288	homozygous	ns
10NN0255	CML333/B73 NIL-1144	280	NC350	2	11582513	16870108	homozygous	ns
10NN0255	CML333/B73 NIL-1144	281	NC350	5	202175965	204542892	homozygous	ns
10NN0255	CML333/B73 NIL-1144	282	NC350	8	109727383	165875836	heterozygous	ns
10NN0255	CML333/B73 NIL-1144	283	NC350	10	148228092	149921672	homozygous	ns
10NN0257	CML333/B73 NIL-1153	284	CML333	2	209354337	215041432	homozygous	susceptible
10NN0257	CML333/B73 NIL-1153	285	CML333	2	224207250	236974112	homozygous	susceptible
10NN0257	CML333/B73 NIL-1153	286	CML333	4	171919013	174773667	homozygous	susceptible
10NN0257	CML333/B73 NIL-1153	287	CML333	9	152056205	153837445	heterozygous	susceptible
10NN0259	CML333/B73 NIL-1160	288	CML333	2	4209554	23669346	homozygous	susceptible
10NN0261	CML333/B73 NIL-1210	289	CML333	5	175459879	186238725	homozygous	ns
10NN0261	CML333/B73 NIL-1210	290	CML333	5	186238725	191631952	heterozygous	ns
10NN0261	CML333/B73 NIL-1210	291, 292	CML333	5	204586302	214127215	homozygous	ns
10NN0263	CML333/B73 NIL-1222	293	CML333	5	22654694	34996624	homozygous	ns
10NN0263	CML333/B73 NIL-1222	294	CML333	7	167621976	176524195	homozygous	ns
10NN0263	CML333/B73 NIL-1222	295	CML333	8	95722511	97939977	heterozygous	ns
10NN0263	CML333/B73 NIL-1222	296	CML333	8	97939977	104624533	homozygous	ns
10NN0263	CML333/B73 NIL-1222	297	CML333	9	89452118	96712667	homozygous	ns
10NN0265	CML333/B73 NIL-1229	298	CML333	2	224834446	236974112	homozygous	ns
10NN0265	CML333/B73 NIL-1229		CML333	5	214527253	217710809	homozygous	ns
10NN0265	CML333/B73 NIL-1229	299	CML333	6	147045687	162109348	homozygous	ns
10NN0265	CML333/B73 NIL-1229	300	CML333	9	0	3895906	homozygous	ns
10NN0269	CML333/B73 NIL-1248	301	CML333	6	162635572	169082784	homozygous	ns
10NN0269	CML333/B73 NIL-1248	302	CML333	9	149170382	151705073	homozygous	ns
10NN0271	CML333/B73 NIL-1269	303	CML333	1	40053605	81106836	homozygous	ns
10NN0271	CML333/B73 NIL-1269	304	CML333	1	195187249	199754817	homozygous	ns
10NN0271	CML333/B73 NIL-1269	305	CML333	1	262513988	280217881	homozygous	ns
10NN0271	CML333/B73 NIL-1269		CML333	1	288208569	290122513	homozygous	ns
10NN0271	CML333/B73 NIL-1269	306	CML333	6	124978841	128736119	homozygous	ns
10NN0271	CML333/B73 NIL-1269	307	CML333	7	100263850	116386370	homozygous	ns
10NN0273	CML333/B73 NIL-1274	308	CML333	1	262513988	278359053	homozygous	ns
10NN0273	CML333/B73 NIL-1274		CML333	1	290590786	293146745	heterozygous	ns
10NN0273	CML333/B73 NIL-1274	309	CML333	7	106994755	116386632	homozygous	ns
10NN0279	CML333/B73 NIL-1295	310	CML333	3	206674954	223691804	homozygous	ns
10NN0279	CML333/B73 NIL-1295	311	CML333	3	223691804	226809244	heterozygous	ns
10NN0279	CML333/B73 NIL-1295	312	CML333	8	137007162	152970069	heterozygous	ns
10NN0279	CML333/B73 NIL-1295	313	CML333	8	152970069	160388606	homozygous	ns
10NN0279	CML333/B73 NIL-1295	314	CML333	8	160388606	171858544	heterozygous	ns
10NN0283	CML333/B73 NIL-1308	315	CML333	4	14727904	202787049	homozygous	resistant
10NN0283	CML333/B73 NIL-1308	316	CML333	4	226946499	237608512	homozygous	resistant
10NN0283	CML333/B73 NIL-1308	317	CML333	6	112957272	121390584	homozygous	resistant
10NN0283	CML333/B73 NIL-1308	318	CML333	6	124803841	147024828	homozygous	resistant
10NN0285	CML333/B73 NIL-1320	319	CML333	4	180897597	195121766	heterozygous	ns
10NN0285	CML333/B73 NIL-1320	320	CML333	4	195121766	202787049	homozygous	ns
10NN0285	CML333/B73 NIL-1320	321	CML333	4	226620999	237522348	homozygous	ns
10NN0285	CML333/B73 NIL-1320	322	CML333	6	112804040	147023088	homozygous	ns
10NN0285	CML333/B73 NIL-1320	323	CML333	9	0	3397074	heterozygous	ns
10NN0287	CML52/B73 NIL-1009	324	CML333	1	182544272	197602782	homozygous	ns
10NN0287	CML52/B73 NIL-1009	325	CML333	4	170970713	173300845	homozygous	ns
10NN0287	CML52/B73 NIL-1009	325	CML333	4	182193846	185718861	homozygous	ns
10NN0287	CML52/B73 NIL-1009	326	CML333	7	104615787	117942274	homozygous	ns
10NN0287	CML52/B73 NIL-1009	326	CML333	7	117942274	124866931	heterozygous	ns
10NN0289	CML52/B73 NIL-1010	327	CML333	1	30280535	48505459	homozygous	susceptible
10NN0289	CML52/B73 NIL-1010	328, 329, 330, 331, 332	CML333	3	121202881	162067355	homozygous	susceptible
10NN0289	CML52/B73 NIL-1010	333	CML333	7	168681938	172583812	heterozygous	susceptible
10NN0291	CML52/B73 NIL-1010	334	CML333	2	229416467	234725748	homozygous	ns
10NN0293	CML52/B73 NIL-1016	335	CML52	2	12114147	15012901	heterozygous	ns
10NN0293	CML52/B73 NIL-1016	336	CML52	8	0	3486207	heterozygous	ns
10NN0293	CML52/B73 NIL-1016	337	CML52	8	24346566	39735728	heterozygous	ns
10NN0293	CML52/B73 NIL-1016	338	CML52	8	73729547	75991276	homozygous	ns
10NN0293	CML52/B73 NIL-1016	339	CML52	8	75991276	101118462	heterozygous	ns
10NN0293	CML52/B73 NIL-1016	340	CML52	8	101118462	115128997	homozygous	ns
10NN0293	CML52/B73 NIL-1016	341	CML52	8	115128997	146554337	heterozygous	ns
10NN0295	CML52/B73 NIL-1016	342	CML52	8	71974790	146556467	homozygous	ns
10NN0295	CML52/B73 NIL-1016	343	CML52	8	151058820	155905562	heterozygous	ns
10NN0299	CML52/B73 NIL-1041	344, 345, 346, 347, 348	NC358	5	27247333	158894174	homozygous	susceptible
10NN0299	CML52/B73 NIL-1041	349	NC358	5	158894174	164859268	heterozygous	susceptible
10NN0299	CML52/B73 NIL-1041	350	NC358	5	167938504	171175682	heterozygous	susceptible
10NN0301	CML52/B73 NIL-1047	351	CML52	2	232648589	236974123	homozygous	ns
10NN0301	CML52/B73 NIL-1047	352, 353	CML52	6	111056605	129966756	homozygous	ns
10NN0305	CML52/B73 NIL-1099	354	CML52	3	4715125	7123327	homozygous	ns
10NN0305	CML52/B73 NIL-1099	355	CML52	3	204284776	214372037	homozygous	ns
10NN0305	CML52/B73 NIL-1099	356	CML52	3	216426096	229573144	heterozygous	ns
10NN0305	CML52/B73 NIL-1099	357	CML52	3	229573144	232045884	homozygous	ns
10NN0305	CML52/B73 NIL-1099	358	CML52	5	169839841	174345033	homozygous	ns
10NN0305	CML52/B73 NIL-1099	359	CML52	9	27095035	96247771	homozygous	ns
10NN0307	CML52/B73 NIL-1104		NC358	5	172100916	175211216	homozygous	susceptible
10NN0307	CML52/B73 NIL-1104		NC358	5	175211216	178924329	heterozygous	susceptible
10NN0307	CML52/B73 NIL-1104	360	NC358	5	178924329	189886808	homozygous	susceptible
10NN0307	CML52/B73 NIL-1104	361	NC358	5	198780685	212869864	homozygous	susceptible
10NN0307	CML52/B73 NIL-1104		NC358	6	162103266	163975475	homozygous	susceptible
10NN0307	CML52/B73 NIL-1104	362, 363, 364, 365, 366	NC358	7	13980582	101118957	homozygous	susceptible
10NN0309	CML52/B73 NIL-1108	367	CML52	1	246481747	279925292	homozygous	ns
10NN0311	CML52/B73 NIL-1113	368	CML52	1	10827989	26914486	homozygous	resistant
10NN0311	CML52/B73 NIL-1113	369	CML52	9	141788413	149666186	homozygous	resistant
10NN0313	CML52/B73 NIL-1120	370	CML52	1	291893740	301170541	homozygous	ns
10NN0313	CML52/B73 NIL-1120	371	CML52	7	152006159	156569508	homozygous	ns
10NN0315	CML52/B73 NIL-1134	372	CML52	1	291893740	301170541	homozygous	ns
10NN0317	CML52/B73 NIL-1143	373	CML52	6	162696441	165542562	homozygous	ns
10NN0319	CML52/B73 NIL-1159	374	CML52	4	145706371	166875897	homozygous	resistant
10NN0319	CML52/B73 NIL-1159	375	CML52	7	152006159	154900471	homozygous	resistant
10NN0321	CML52/B73 NIL-1161	376	CML52	1	254401049	260771277	homozygous	ns
10NN0321	CML52/B73 NIL-1161	377	CML52	2	232486784	236974123	homozygous	ns
10NN0321	CML52/B73 NIL-1161	378	CML52	8	173595222	175508766	homozygous	ns
10NN0323	CML52/B73 NIL-1174		CML52	2	1972740	3598362	heterozygous	ns
10NN0323	CML52/B73 NIL-1174	379	CML52	2	3598362	11647831	homozygous	ns
10NN0323	CML52/B73 NIL-1174	380	CML52	3	223961497	227426831	homozygous	ns
10NN0323	CML52/B73 NIL-1174	381	CML52	3	227426831	232045884	heterozygous	ns
10NN0323	CML52/B73 NIL-1174	382, 383	CML52	7	135506347	141889636	homozygous	ns
10NN0325	CML52/B73 NIL-1212	384	CML52	1	226312499	228255152	heterozygous	ns
10NN0325	CML52/B73 NIL-1212	384	CML52	1	228255152	234058835	homozygous	ns
10NN0325	CML52/B73 NIL-1212	384	CML52	1	234058835	235834041	heterozygous	ns
10NN0325	CML52/B73 NIL-1212	384	CML52	1	235834041	246481747	homozygous	ns
10NN0325	CML52/B73 NIL-1212	385	CML52	2	1972740	11641546	homozygous	ns
10NN0325	CML52/B73 NIL-1212	386	CML52	3	223961497	227426831	homozygous	ns
10NN0325	CML52/B73 NIL-1212	387	CML52	3	227426831	232045884	heterozygous	ns
10NN0325	CML52/B73 NIL-1212	388, 389	CML52	7	135506347	143003918	homozygous	ns
10NN0327	CML52/B73 NIL-1224	390	NC358	3	159381074	183888835	homozygous	ns
10NN0327	CML52/B73 NIL-1224	391	NC358	3	226412704	232093966	heterozygous	ns
10NN0327	CML52/B73 NIL-1224	392	NC358	4	0	3465352	heterozygous	ns
10NN0327	CML52/B73 NIL-1224		NC358	8	2990983	4915819	homozygous	ns
10NN0329	CML52/B73 NIL-1225	393	NC358	6	106886135	109613892	homozygous	ns
10NN0329	CML52/B73 NIL-1225		NC358	6	109613892	112004342	heterozygous	ns
10NN0331	CML52/B73 NIL-1237	394	NC358	4	5367302	31115536	homozygous	ns
10NN0331	CML52/B73 NIL-1237	395	NC358	4	178665749	185181544	homozygous	ns
10NN0333	CML52/B73 NIL-1247	396	NC358	1	33799569	56965370	homozygous	susceptible
10NN0333	CML52/B73 NIL-1247	397	NC358	4	5370273	17367071	homozygous	susceptible
10NN0333	CML52/B73 NIL-1247		NC358	4	17367071	23166592	heterozygous	susceptible
10NN0333	CML52/B73 NIL-1247	398	NC358	4	178665749	191236988	homozygous	susceptible
10NN0335	CML52/B73 NIL-1257	399	CML52	3	140409870	151356381	homozygous	ns
10NN0335	CML52/B73 NIL-1257	400	CML52	3	183316338	201255999	homozygous	ns
10NN0339	CML52/B73 NIL-1261	401	CML69	1	228253654	235814963	heterozygous	ns
10NN0339	CML52/B73 NIL-1261		CML69	1	235819704	241001276	homozygous	ns
10NN0339	CML52/B73 NIL-1261	402	CML69	7	166754402	176524195	homozygous	ns
10NN0339	CML52/B73 NIL-1261		CML69	9	8965565	11451167	homozygous	ns
10NN0343	CML52/B73 NIL-1305	403	CML52	1	206508104	234826223	homozygous	ns
10NN0343	CML52/B73 NIL-1305	404	CML52	3	6519059	11447286	homozygous	ns
10NN0343	CML52/B73 NIL-1305	405	CML52	3	11447286	17583826	heterozygous	ns
10NN0343	CML52/B73 NIL-1305	405	CML52	3	19758152	22621619	heterozygous	ns
10NN0343	CML52/B73 NIL-1305	406	CML52	5	176887979	199731768	homozygous	ns
10NN0347	CML69/B73 NIL-1005	407	CML69	1	87981328	90074476	heterozygous	resistant
10NN0347	CML69/B73 NIL-1005	408	CML69	1	90105799	195188388	homozygous	resistant
10NN0347	CML69/B73 NIL-1005	409	CML69	8	0	8287194	heterozygous	resistant
10NN0347	CML69/B73 NIL-1005	410	CML69	8	18609183	21874391	heterozygous	resistant
10NN0349	CML69/B73 NIL-1009	411	CML69	7	30877860	34681292	heterozygous	ns
10NN0349	CML69/B73 NIL-1009	412	CML69	7	34681292	52498499	homozygous	ns
10NN0349	CML69/B73 NIL-1009	413	CML69	7	85722566	92335915	homozygous	ns
10NN0349	CML69/B73 NIL-1009	414	CML69	7	92335915	128647778	heterozygous	ns
10NN0351	CML69/B73 NIL-1025	415	CML69	1	196546122	202169556	homozygous	resistant
10NN0351	CML69/B73 NIL-1025	416	CML69	2	224595151	229010607	heterozygous	resistant
10NN0351	CML69/B73 NIL-1025	417	CML69	3	16615268	25609675	heterozygous	resistant
10NN0351	CML69/B73 NIL-1025	418	CML69	3	25609675	30854638	homozygous	resistant
10NN0351	CML69/B73 NIL-1025	418	CML69	3	30854638	32404499	heterozygous	resistant
10NN0351	CML69/B73 NIL-1025	418	CML69	3	32404499	34440945	homozygous	resistant
10NN0351	CML69/B73 NIL-1025	419	CML69	3	34440945	37359386	heterozygous	resistant
10NN0351	CML69/B73 NIL-1025	420	CML69	3	37359386	43360500	homozygous	resistant
10NN0351	CML69/B73 NIL-1025	421	CML69	3	43360500	48494112	heterozygous	resistant
10NN0351	CML69/B73 NIL-1025	422	CML69	3	48494112	59433457	homozygous	resistant
10NN0351	CML69/B73 NIL-1025	423	CML69	3	59433457	82616217	heterozygous	resistant
10NN0351	CML69/B73 NIL-1025	424	CML69	3	82616217	87782981	homozygous	resistant
10NN0351	CML69/B73 NIL-1025	425	CML69	3	87782981	95982499	heterozygous	resistant
10NN0351	CML69/B73 NIL-1025	426	CML69	3	95982499	112043488	homozygous	resistant
10NN0351	CML69/B73 NIL-1025	427	CML69	3	112043488	121202907	heterozygous	resistant
10NN0351	CML69/B73 NIL-1025	427	CML69	3	121202907	123403876	homozygous	resistant
10NN0351	CML69/B73 NIL-1025	427	CML69	3	123403876	135230881	heterozygous	resistant
10NN0351	CML69/B73 NIL-1025	427	CML69	3	137246963	165449174	heterozygous	resistant
10NN0351	CML69/B73 NIL-1025	428	CML69	3	169080023	205245435	homozygous	resistant
10NN0353	CML69/B73 NIL-1032	429	CML69	5	192267062	208198581	homozygous	susceptible
10NN0353	CML69/B73 NIL-1032	430	CML69	5	208198581	211074757	heterozygous	susceptible
10NN0353	CML69/B73 NIL-1032	431	CML69	6	142787669	144720199	homozygous	susceptible
10NN0353	CML69/B73 NIL-1032	432	CML69	9	149429315	152059017	homozygous	susceptible
10NN0355	CML69/B73 NIL-1040	433	CML69	1	241268707	241001276	homozygous	ns
10NN0355	CML69/B73 NIL-1040	434	CML69	7	166754402	176524195	homozygous	ns
10NN0355	CML69/B73 NIL-1040	435	CML69	9	0	11217622	homozygous	ns
10NN0357	CML69/B73 NIL-1048	436	CML69		17882576	31747529	homozygous	ns
10NN0357	CML69/B73 NIL-1048	437	CML69	4	231402506	235722199	homozygous	ns
10NN0359	CML69/B73 NIL-1057		CML69	6	150740408	150799578	homozygous	ns
10NN0361	CML69/B73 NIL-1073	438	CML69	1	295351022	301248240	homozygous	ns
10NN0365	CML69/B73 NIL-1085	439	CML69	3	223310429	230340628	homozygous	ns
10NN0367	CML69/B73 NIL-1085	440	CML69	2	15013415	23667813	homozygous	ns
10NN0367	CML69/B73 NIL-1085	441	CML69	2	206365515	211592275	homozygous	ns
10NN0369	CML69/B73 NIL-1118	442	CML69	5	17966912	28110634	heterozygous	ns
10NN0369	CML69/B73 NIL-1118	443	CML69	5	28110634	155530509	homozygous	ns
10NN0371	CML69/B73 NIL-1120	444	CML69	5	28672811	155530509	homozygous	ns
10NN0373	CML69/B73 NIL-1124	445, 446, 447, 448, 449, 450, 451	Mo17	3	0	141691041	homozygous	susceptible
10NN0373	CML69/B73 NIL-1124		Mo17	4	227984176	233203204	heterozygous	susceptible
10NN0373	CML69/B73 NIL-1124	452	Mo17	6	96673808	102221575	heterozygous	susceptible
10NN0373	CML69/B73 NIL-1124	453	Mo17	7	143410022	156741760	homozygous	susceptible
10NN0373	CML69/B73 NIL-1124	454	Mo17	8	170139437	175697699	homozygous	susceptible
10NN0373	CML69/B73 NIL-1124	455, 456, 457, 458, 459	Mo17	9	77307430	141452283	homozygous	susceptible
10NN0373	CML69/B73 NIL-1124	460	Mo17	10	628920	5949876	homozygous	susceptible
10NN0379	CML69/B73 NIL-1147	461	CML69	2	232364638	236974112	homozygous	ns
10NN0379	CML69/B73 NIL-1147	462	CML69	8	151658211	163968706	homozygous	ns
10NN0381	CML69/B73 NIL-1154	463, 464, 465	CML69	1	223038822	278606261	homozygous	ns
10NN0381	CML69/B73 NIL-1154	466	CML69	7	127891598	129955578	homozygous	ns
10NN0381	CML69/B73 NIL-1154	467	CML69	8	19121519	95722485	homozygous	ns
10NN0383	CML69/B73 NIL-1180	468	CML69	7	14459913	20195472	homozygous	susceptible
10NN0383	CML69/B73 NIL-1180	468	CML69	7	20195472	21869640	heterozygous	susceptible
10NN0383	CML69/B73 NIL-1180	468	CML69	7	21869640	84026055	homozygous	susceptible
10NN0385	CML69/B73 NIL-1189	469	CML69	3	4723554	138336871	homozygous	resistant
10NN0387	CML69/B73 NIL-1194	470	CML69	1	7860796	15176371	homozygous	ns
10NN0387	CML69/B73 NIL-1194		CML69	5	186875959	188449398	heterozygous	ns
10NN0389	CML69/B73 NIL-1194	471	CML103	2	23838174	33680817	homozygous	resistant
10NN0389	CML69/B73 NIL-1194	472	CML103	2	51241471	62727600	heterozygous	resistant
10NN0389	CML69/B73 NIL-1194	473, 474, 475	CML103	2	67845431	150834569	heterozygous	resistant
10NN0389	CML69/B73 NIL-1194		CML103	3	147970839	150168816	homozygous	resistant
10NN0389	CML69/B73 NIL-1194	476	CML103	6	9193802	111020491	heterozygous	resistant
10NN0389	CML69/B73 NIL-1194	477, 478, 479, 480, 481	CML103	6	111020491	163101922	homozygous	resistant
10NN0391	CML69/B73 NIL-1213	482	CML69	1	85031806	208247644	homozygous	ns
10NN0393	CML69/B73 NIL-1239	483	CML69	1	85018538	208247644	homozygous	resistant
10NN0395	CML69/B73 NIL-1244	484	CML69	1	268939472	269497593	heterozygous	ns
10NN0395	CML69/B73 NIL-1244	484	CML69	1	269497593	281642633	homozygous	ns
10NN0397	CML103/B73 NIL-1340	73	CML69	6	143957734	164871098	homozygous	ns
10NN0399	CML103/B73 NIL-1260	74	CML69	2	8808944	14232480	homozygous	ns
10NN0401	Ki11/B73 NIL-1002	485	Ki11	5	205151303	210675476	homozygous	susceptible
10NN0403	Ki11/B73 NIL-1055	486	Ki11	2	19143471	29527713	homozygous	susceptible
10NN0403	Ki11/B73 NIL-1055	487	Ki11	7	174279369	176524195	homozygous	susceptible
10NN0403	Ki11/B73 NIL-1055	488	Ki11	9	5678126	7403437	homozygous	susceptible
10NN0405	Ki11/B73 NIL-1134	489	Ki11	6	97946476	118141924	homozygous	susceptible
10NN0407	Ki11/B73 NIL-1160	490	Ki11	4	180897360	191580087	heterozygous	ns
10NN0407	Ki11/B73 NIL-1160	491	Ki11	4	191580087	231406733	homozygous	ns
10NN0407	Ki11/B73 NIL-1160	492	Ki11	4	231406733	237610360	heterozygous	ns
10NN0407	Ki11/B73 NIL-1160	492	Ki11	4	237610360	240842987	homozygous	ns
10NN0407	Ki11/B73 NIL-1160	493	Ki11	5	163412014	168872281	heterozygous	ns
10NN0407	Ki11/B73 NIL-1160	494	Ki11	9	0	8457442	homozygous	ns
10NN0407	Ki11/B73 NIL-1160	495	Ki11	10	143502566	145473521	heterozygous	ns
10NN0407	Ki11/B73 NIL-1160	496	Ki11	10	145473521	147354951	homozygous	ns
10NN0409	Ki11/B73 NIL-1190		Ki11	1	179646251	182541363	heterozygous	ns
10NN0411	Ki11/B73 NIL-1203	497	Ki11	1	26914893	184242660	homozygous	ns
10NN0411	Ki11/B73 NIL-1203	498	Ki11	1	199485130	205832517	homozygous	ns
10NN0413	Ki11/B73 NIL-1225	499	Ki11	1	45365647	206119647	homozygous	resistant
10NN0417	Ki11/B73 NIL-1185	500	Ki11	5	11735870	22102028	homozygous	ns
10NN0419	Ki3/B73 NIL-1012		Ki11	2	41779708	153951367	homozygous	ns
10NN0419	Ki3/B73 NIL-1012	560	Ki11	6	153879693	164146940	homozygous	ns
10NN0421	Ki3/B73 NIL-1016		Ki11	2	41886583	153951727	homozygous	ns
10NN0421	Ki3/B73 NIL-1016	565	Ki11	6	153843919	160235387	heterozygous	ns
10NN0421	Ki3/B73 NIL-1016	565	Ki11	6	160235387	164146578	homozygous	ns
10NN0423	Ki3/B73 NIL-1049		Ki3	3	6804888	7080524	homozygous	ns
10NN0425	Ki3/B73 NIL-1068	566, 567	Ki11	7	141545918	156495883	homozygous	ns
10NN0427	Ki3/B73 NIL-1076	568	Mo17	2	10479591	16307284	heterozygous	ns
10NN0427	Ki3/B73 NIL-1076	569	Mo17	2	202417521	207834646	heterozygous	ns
10NN0427	Ki3/B73 NIL-1076	569	Mo17	2	207834646	209952912	homozygous	ns
10NN0427	Ki3/B73 NIL-1076	569	Mo17	2	209952912	211508185	heterozygous	ns
10NN0427	Ki3/B73 NIL-1076	570	Mo17	2	215124613	232879019	heterozygous	ns
10NN0427	Ki3/B73 NIL-1076	571	Mo17	3	210817949	222569166	homozygous	ns
10NN0427	Ki3/B73 NIL-1076		Mo17	7	147121703	149854404	heterozygous	ns
10NN0427	Ki3/B73 NIL-1076	572	Mo17	8	168275496	173506594	homozygous	ns
10NN0429	Ki3/B73 NIL-1106	573	Mo17	1	176841472	196051728	homozygous	ns
10NN0429	Ki3/B73 NIL-1106	574	Mo17	1	223773356	227834435	heterozygous	ns
10NN0429	Ki3/B73 NIL-1106		Mo17	1	254988174	256669820	homozygous	ns
10NN0429	Ki3/B73 NIL-1106		Mo17	1	256669820	258883516	heterozygous	ns
10NN0429	Ki3/B73 NIL-1106	575	Mo17	2	10479591	16355669	heterozygous	ns
10NN0429	Ki3/B73 NIL-1106	576	Mo17	2	202417618	207834646	heterozygous	ns
10NN0429	Ki3/B73 NIL-1106	576	Mo17	2	207834646	209952912	homozygous	ns
10NN0429	Ki3/B73 NIL-1106	576	Mo17	2	209952912	229287874	heterozygous	ns
10NN0429	Ki3/B73 NIL-1106	577	Mo17	3	210583263	224165225	homozygous	ns
10NN0429	Ki3/B73 NIL-1106	578	Mo17	5	74730987	139192204	heterozygous	ns
10NN0429	Ki3/B73 NIL-1106	579, 580	Mo17	5	139192204	194558171	homozygous	ns
10NN0429	Ki3/B73 NIL-1106	581	Mo17	8	169256433	173506594	homozygous	ns
10NN0429	Ki3/B73 NIL-1106	582	Mo17	9	7699442	12870644	homozygous	ns
10NN0429	Ki3/B73 NIL-1106		Mo17	9	69996275	74593271	heterozygous	ns
10NN0429	Ki3/B73 NIL-1106	583	Mo17	10	605251	2650892	homozygous	ns
10NN0431	Ki3/B73 NIL-1110	584	Ki11	2	216786041	232965192	homozygous	ns
10NN0431	Ki3/B73 NIL-1110	584	Ki11	2	232965192	236974206	heterozygous	ns
10NN0431	Ki3/B73 NIL-1110	585	Ki11	6	135216350	152286066	heterozygous	ns
10NN0433	Ki3/B73 NIL-1117	586, 587	Ki11	3	167070947	179219213	homozygous	ns
10NN0433	Ki3/B73 NIL-1117	588, 589, 590, 591, 592, 593	Ki11	7	9795618	130781909	homozygous	ns
10NN0435	Ki3/B73 NIL-1117		Ki11	1	263603731	266956184	homozygous	resistant
10NN0435	Ki3/B73 NIL-1117	594, 595, 596, 597, 598	Ki11	8	117552269	156729249	homozygous	resistant
10NN0435	Ki3/B73 NIL-1117	599	Ki11	10	147813673	150107228	homozygous	resistant
10NN0437	Ki3/B73 NIL-1120	600	Tzi8	1	285125747	289269762	heterozygous	ns
10NN0437	Ki3/B73 NIL-1120		Tzi8	5	209285167	211299525	heterozygous	ns
10NN0437	Ki3/B73 NIL-1120	601	Tzi8	7	130707573	143296121	heterozygous	ns
10NN0439	Ki3/B73 NIL-1158	602	Ki11	1	9356128	17492494	heterozygous	ns
10NN0439	Ki3/B73 NIL-1158	603, 604, 605	Ki11	3	61342139	175964465	heterozygous	ns
10NN0439	Ki3/B73 NIL-1158	606	Ki11	3	206605393	219488290	heterozygous	ns
10NN0441	Ki3/B73 NIL-1163	607, 608, 609	Ki11	4	31101470	145565809	homozygous	ns
10NN0441	Ki3/B73 NIL-1163		Ki11	7	170033711	171745352	homozygous	ns
10NN0443	KI3/B73 NIL-1168	610	Mo17	1	283583051	287146450	heterozygous	susceptible
10NN0443	KI3/B73 NIL-1168	611	Mo17	3	13484401	19940386	homozygous	susceptible
10NN0443	KI3/B73 NIL-1168	611	Mo17	3	19940386	22381995	heterozygous	susceptible
10NN0443	KI3/B73 NIL-1168	612	Mo17	3	30054134	45048638	heterozygous	susceptible
10NN0443	KI3/B73 NIL-1168	612	Mo17	3	45048638	47592726	homozygous	susceptible
10NN0443	KI3/B73 NIL-1168	613	Mo17	3	47592726	63177470	heterozygous	susceptible
10NN0443	KI3/B73 NIL-1168	614	Mo17	3	63177470	66861769	homozygous	susceptible
10NN0443	KI3/B73 NIL-1168	614	Mo17	3	66861769	87257799	heterozygous	susceptible
10NN0443	KI3/B73 NIL-1168	615	Mo17	3	91452122	115110716	heterozygous	susceptible
10NN0443	KI3/B73 NIL-1168	615	Mo17	3	122496235	125690238	homozygous	susceptible
10NN0443	KI3/B73 NIL-1168	616, 617	Mo17	3	128650431	165460139	homozygous	susceptible
10NN0443	KI3/B73 NIL-1168		Mo17	5	74730987	76633652	heterozygous	susceptible
10NN0445	Ki3/B73 NIL-1190	618	Ki11	1	292573576	301170541	homozygous	ns
10NN0445	Ki3/B73 NIL-1190	619	Ki11	2	14229805	25383386	heterozygous	ns
10NN0445	Ki3/B73 NIL-1190	620	Ki11	2	49957773	60074594	heterozygous	ns
10NN0445	Ki3/B73 NIL-1190		Ki11	3	179125814	181332663	homozygous	ns
10NN0447	Ki3/B73 NIL-1201		Ki3	2	189737748	191359456	homozygous	ns
10NN0449	Ki3/B73 NIL-1207	621	Ki11	3	6802898	12545740	homozygous	ns
10NN0451	Ki3/B73 NIL-1212	622	Ki11	2	222090567	224064557	homozygous	ns
10NN0451	Ki3/B73 NIL-1212	622	Ki11	2	224064557	230520512	heterozygous	ns
10NN0451	Ki3/B73 NIL-1212	623	Ki11	4	174847485	189978010	homozygous	ns
10NN0453	Ki3/B73 NIL-1222	626	Ki3	6	112436121	147985250	homozygous	resistant
10NN0455	Ki3/B73 NIL-1260	627	Ki3	1	2752970	5590523	heterozygous	susceptible
10NN0455	Ki3/B73 NIL-1260	628	Ki3	1	5590523	17383134	homozygous	susceptible
10NN0455	Ki3/B73 NIL-1260	629	Ki3	8	0	4430722	homozygous	susceptible
10NN0455	Ki3/B73 NIL-1260	630	Ki3	8	8290322	17060597	heterozygous	susceptible
10NN0457	Kill/B73 NIL-1018	515	Ki3	4	10455637	14386748	homozygous	ns
10NN0459	Kill/B73 NIL-1028	516	Ki3	3	178063026	199252242	heterozygous	ns
10NN0459	Kill/B73 NIL-1028		Ki3	5	42458708	50332294	heterozygous	ns
10NN0459	Kill/B73 NIL-1028	517	Ki3	7	0	3170435	heterozygous	ns
10NN0461	Kill/B73 NIL-1038	518	Ki3	1	245902661	251114089	homozygous	resistant
10NN0461	Kill/B73 NIL-1038		Ki3	4	2117003	3744251	homozygous	resistant
10NN0461	Kill/B73 NIL-1038	519, 520, 521, 522, 523	Ki3	8	22936202	145190910	homozygous	resistant
10NN0463	Kill/B73 NIL-1054	524	Ki3	2	231382396	236974123	homozygous	ns
10NN0463	Kill/B73 NIL-1054	525	Ki3	9	153490973	156412412	heterozygous	ns
10NN0465	Kill/B73 NIL-1062		Ki3	1	89238048	94013849	heterozygous	susceptible
10NN0465	Kill/B73 NIL-1062	526	Ki3	1	188052844	197361681	homozygous	susceptible
10NN0465	Kill/B73 NIL-1062	526	Ki3	1	197361681	199730606	heterozygous	susceptible
10NN0465	Kill/B73 NIL-1062	527	Ki3	3	183646761	189693517	homozygous	susceptible
10NN0465	Kill/B73 NIL-1062		Ki3	6	160167106	162111342	homozygous	susceptible
10NN0465	Kill/B73 NIL-1062	528	Ki3	7	6535944	8569619	homozygous	susceptible
10NN0467	Kill/B73 NIL-1086	529, 530, 531, 532, 533, 534, 535	Ki3	1	41945129	173681342	homozygous	ns
10NN0467	Kill/B73 NIL-1086		Ki3	9	97255467	100678209	heterozygous	ns
10NN0467	Kill/B73 NIL-1086	536	Ki3	9	148367039	151987537	homozygous	ns
10NN0469	Kill/B73 NIL-1090		Ki3	1	42488204	49131053	heterozygous	ns
10NN0469	Kill/B73 NIL-1090	537, 538, 539, 540, 541, 542, 543	Ki3	1	82004804	188771133	homozygous	ns
10NN0469	Kill/B73 NIL-1090	544	Ki3	7	153568894	159604208	heterozygous	ns
10NN0469	Kill/B73 NIL-1090		Ki3	9	98506939	100612331	homozygous	ns
10NN0471	Kill/B73 NIL-1090		Ki11	2	224125360	225651760	homozygous	ns
10NN0471	Kill/B73 NIL-1090		Ki11	5	657251	1582435	heterozygous	ns
10NN0473	Kill/B73 NIL-1096	545	Ki3	5	186402815	208961565	homozygous	susceptible
10NN0473	Kill/B73 NIL-1096	545	Ki3	5	208961565	211384173	heterozygous	susceptible
10NN0475	Kill/B73 NIL-1114	546	Ki3	7	127214393	134128840	heterozygous	ns
10NN0475	Kill/B73 NIL-1114	546	Ki3	7	134128840	146239031	homozygous	ns
10NN0477	Kill/B73 NIL-1149	547	Ki3	7	127251617	133940648	heterozygous	ns
10NN0477	Kill/B73 NIL-1149	547	Ki3	7	133940648	146119080	homozygous	ns
10NN0479	Kill/B73 NIL-1164	548	Ki11	3	207764102	214854799	homozygous	ns
10NN0481	Kill/B73 NIL-1170	549	Mo17	1	295193011	300992355	homozygous	susceptible
10NN0483	Kill/B73 NIL-1200		Ki11	7	141514202	141584187	homozygous	ns
10NN0485	Ki11/B73 NIL-1031		Ki3	1	232744629	235667580	homozygous	ns
10NN0485	Ki11/B73 NIL-1031	550	Ki3	5	12561825	42458708	homozygous	ns
10NN0485	Ki11/B73 NIL-1031	550	Ki3	5	42458708	59726156	heterozygous	ns
10NN0485	Ki11/B73 NIL-1031	551, 552	Ki3	5	188759017	193537563	heterozygous	ns
10NN0487	Ki11/B73 NIL-1126	553	Ki3	4	130576689	145360180	homozygous	ns
10NN0489	Ki11/B73 NIL-1128	554	Ki3	1	199501674	230882239	homozygous	ns
10NN0489	Ki11/B73 NIL-1128		Ki3	3	0	1976064	heterozygous	ns
10NN0489	Ki11/B73 NIL-1128	555	Ki3	10	118990558	127608308	homozygous	ns
10NN0491	Ki3/B73 NIL-1027	631	Ki3	8	23889819	101756699	homozygous	resistant
10NN0493	Ki3/B73 NIL-1037	632	Ki3	1	229111261	300925689	homozygous	ns
10NN0493	Ki3/B73 NIL-1037	633	Ki3	8	157621002	161538583	heterozygous	ns
10NN0493	Ki3/B73 NIL-1037	634	Ki3	9	138319439	144034343	homozygous	ns
10NN0493	Ki3/B73 NIL-1037	635	Ki3	9	144034343	147168184	heterozygous	ns
10NN0495	Ki3/B73 NIL-1044	636	Ki3	2	213190644	220725880	homozygous	ns
10NN0495	Ki3/B73 NIL-1044	637	Ki3	3	215475246	232019381	homozygous	ns
10NN0495	Ki3/B73 NIL-1044	638	Ki3	9	5159339	19626182	homozygous	ns
10NN0497	Ki3/B73 NIL-1077	639	Mo17	4	159562658	177341661	heterozygous	susceptible
10NN0497	Ki3/B73 NIL-1077	640, 641	Mo17	5	174160214	199291663	homozygous	susceptible
10NN0499	Ki3/B73 NIL-1123	642, 643	Mo17	4	171771440	202275101	heterozygous	ns
10NN0499	Ki3/B73 NIL-1123	644	Mo17	8	13912890	17059346	homozygous	ns
10NN0499	Ki3/B73 NIL-1123	645	Mo17	9	5467345	10340016	homozygous	ns
10NN0499	Ki3/B73 NIL-1123	646, 647	Mo17	9	26801491	74584957	heterozygous	ns
10NN0499	Ki3/B73 NIL-1123	648	Mo17	9	87134767	109131980	homozygous	ns
10NN0499	Ki3/B73 NIL-1123	649	Mo17	9	122921439	128539344	heterozygous	ns
10NN0499	Ki3/B73 NIL-1123		Mo17	9	138319439	143963358	homozygous	ns
10NN0499	Ki3/B73 NIL-1123	650	Mo17	9	144034343	147137465	heterozygous	ns
10NN0503	Ki3/B73 NIL-1194	651	Ki3	1	19317427	21602146	heterozygous	ns
10NN0503	Ki3/B73 NIL-1194	651	Ki3	1	21602146	40042612	homozygous	ns
10NN0503	Ki3/B73 NIL-1194	652	Ki3	1	190763612	208315948	homozygous	ns
10NN0503	Ki3/B73 NIL-1194	653	Ki3	5	18011955	39820529	homozygous	ns
10NN0503	Ki3/B73 NIL-1194	654	Ki3	5	176489480	181835894	heterozygous	ns
10NN0503	Ki3/B73 NIL-1194	655	Ki3	8	165585334	167381063	homozygous	ns
10NN0503	Ki3/B73 NIL-1194	656	Ki3	8	169401635	173321762	homozygous	ns
10NN0503	Ki3/B73 NIL-1194	657	Ki3	9	0	14455079	homozygous	ns
10NN0505	Mo17/B73 NIL-1007	735, 736, 737, 738	M162W	5	39888667	92368783	homozygous	ns
10NN0505	Mo17/B73 NIL-1007	739	M162W	5	169224663	188644177	heterozygous	ns
10NN0505	Mo17/B73 NIL-1007	740	M162W	5	188644177	190718068	homozygous	ns
10NN0505	Mo17/B73 NIL-1007	741	M162W	10	138212666	139839379	heterozygous	ns
10NN0505	Mo17/B73 NIL-1007	741	M162W	10	139839379	141368248	homozygous	ns
10NN0507	Mo17/B73 NIL-1035	742	M162W	1	215207793	232744596	heterozygous	ns
10NN0507	Mo17/B73 NIL-1035	743, 744, 745	M162W	2	45204536	163680514	homozygous	ns
10NN0507	Mo17/B73 NIL-1035		M162W	5	205593093	207501024	homozygous	ns
10NN0507	Mo17/B73 NIL-1035		M162W	8	160096819	171875644	homozygous	ns
10NN0509	Mo17/B73 NIL-1041	746	M162W	6	162009915	168066677	homozygous	ns
10NN0511	Mo17/B73 NIL-1055		M162W	1	298226247	300994469	homozygous	susceptible
10NN0511	Mo17/B73 NIL-1055	747	M162W	10	76947801	82892043	heterozygous	susceptible
10NN0511	Mo17/B73 NIL-1055	748, 749	M162W	10	82892043	97734714	homozygous	susceptible
10NN0511	Mo17/B73 NIL-1055	750	M162W	10	97734714	101864778	heterozygous	susceptible
10NN0511	Mo17/B73 NIL-1055	750	M162W	10	101864778	106571821	homozygous	susceptible
10NN0513	Mo17/B73 NIL-1122	751, 752, 753	M162W	1	240282668	291924303	homozygous	ns
10NN0513	Mo17/B73 NIL-1122	754	M162W	3	0	5325639	heterozygous	ns
		755
10NN0513	Mo17/B73 NIL-1122	756	M162W	10	6453593	8723366	homozygous	ns
10NN0515	Mo17/B73 NIL-1129	757	M162W	4	11265000	23524515	homozygous	susceptible
10NN0515	Mo17/B73 NIL-1129	758, 759, 760	M162W	4	197072391	231411523	homozygous	susceptible
10NN0515	Mo17/B73 NIL-1129	760	M162W	4	231411523	233864747	heterozygous	susceptible
10NN0515	Mo17/B73 NIL-1129		M162W	6	92390908	98259586	heterozygous	susceptible
10NN0515	Mo17/B73 NIL-1129		M162W	10	0	1917171	heterozygous	susceptible
10NN0517	Mo17/B73 NIL-1136		M162W	1	27174323	29082673	heterozygous	ns
10NN0517	Mo17/B73 NIL-1136	761	M162W	1	29082673	57246161	homozygous	ns
10NN0517	Mo17/B73 NIL-1136	762	M162W	9	109316500	120251910	homozygous	ns
10NN0519	Mo17/B73 NIL-1141	763, 764, 765, 766	M162W	1	39336405	192101738	homozygous	resistant
10NN0519	Mo17/B73 NIL-1141	767	M162W	9	151282564	156466161	homozygous	resistant
10NN0523	Mo17/B73 NIL-1161	768	M162W	3	4709558	12426932	homozygous	susceptible
10NN0523	Mo17/B73 NIL-1161	769, 770, 771, 772, 773, 774	M162W	4	56859627	163681649	homozygous	susceptible
10NN0523	Mo17/B73 NIL-1161		M162W	6	166256283	168066677	homozygous	susceptible
10NN0525	Mo17/B73 NIL-1165	775, 776	M162W	4	141413307	150102752	homozygous	ns
10NN0525	Mo17/B73 NIL-1165	777	M162W	4	185566213	195217290	homozygous	ns
10NN0525	Mo17/B73 NIL-1165		M162W	6	166256283	168066677	homozygous	ns
10NN0527	Mo17/B73 NIL-1221	778	M162W	3	176332313	184365224	heterozygous	ns
10NN0527	Mo17/B73 NIL-1221		M162W	3	217820947	221539089	heterozygous	ns
10NN0529	Mo17/B73 NIL-1230	779	M162W	3	158971447	179409949	homozygous	ns
10NN0529	Mo17/B73 NIL-1230	780, 781	M162W	6	142549151	147712757	homozygous	ns
10NN0531	Mo17/B73 NIL-1230	782, 783	M162W	3	20426411	49148386	heterozygous	resistant
10NN0531	Mo17/B73 NIL-1230	784	M162W	3	54999222	93826539	homozygous	resistant
10NN0531	Mo17/B73 NIL-1230		M162W	3	97304352	103571539	homozygous	resistant
10NN0531	Mo17/B73 NIL-1230	785	M162W	3	103571539	127311371	heterozygous	resistant
10NN0531	Mo17/B73 NIL-1230	786	M162W	3	130049814	149385958	heterozygous	resistant
10NN0531	Mo17/B73 NIL-1230	787	M162W	3	195700320	198376208	homozygous	resistant
10NN0531	Mo17/B73 NIL-1230	788, 789	M162W	8	0	34703065	heterozygous	resistant
10NN0531	Mo17/B73 NIL-1230	790	M162W	8	34703065	36544187	homozygous	resistant
10NN0531	Mo17/B73 NIL-1230	791	M162W	8	63275767	65786566	homozygous	resistant
10NN0531	Mo17/B73 NIL-1230	792	M162W	8	136039635	156638239	homozygous	resistant
10NN0533	Mo17/B73 NIL-1244	793, 794, 795	M162W	1	94013849	170718794	homozygous	ns
10NN0533	Mo17/B73 NIL-1244	795	M162W	1	170718794	179646571	heterozygous	ns
10NN0533	Mo17/B73 NIL-1244	796	M162W	1	179646571	207527949	homozygous	ns
10NN0533	Mo17/B73 NIL-1244	797	M162W	2	9496107	11672166	homozygous	ns
10NN0533	Mo17/B73 NIL-1244		M162W	2	11672166	168621933	heterozygous	ns
10NN0535	Mo17/B73 NIL-1256	798	M162W	2	10625394	14715751	homozygous	susceptible
10NN0535	Mo17/B73 NIL-1256	799	M162W	4	189295530	206082544	homozygous	susceptible
10NN0535	Mo17/B73 NIL-1256		M162W	4	206082544	214905836	heterozygous	susceptible
10NN0535	Mo17/B73 NIL-1256		M162W	8	157619203	165719671	homozygous	susceptible
10NN0535	Mo17/B73 NIL-1256	800	M162W	9	3562104	5084319	heterozygous	susceptible
10NN0537	Mo17/B73 NIL-1274	801, 802	M162W	2	205839266	236971696	homozygous	ns
10NN0537	Mo17/B73 NIL-1274	803	M162W	9	113061185	114923765	heterozygous	ns
10NN0539	Mo17/B73 NIL-1288	804	M162W	2	2478437	9445001	homozygous	ns
10NN0539	Mo17/B73 NIL-1288	805	M162W	9	6066807	8433747	homozygous	ns
10NN0539	Mo17/B73 NIL-1288	806	M162W	9	8433747	14330285	heterozygous	ns
10NN0541	Mo17/B73 NIL-1291	807, 808, 809, 810, 811, 812	M162W	6	103129102	147985250	homozygous	ns
10NN0543	Mo17/B73 NIL-1316	813	M162W	7	141140822	162669081	homozygous	ns
10NN0545	Mo17/B73 NIL-1320	814	M162W	1	35212737	53422401	homozygous	ns
10NN0545	Mo17/B73 NIL-1320	815	M162W	7	34203653	132592197	homozygous	ns
10NN0547	Mo18W/B73 NIL-1067	816, 817	M162W	1	35190661	50955829	homozygous	resistant
10NN0547	Mo18W/B73 NIL-1067	818, 819	M162W	7	86698421	105502314	homozygous	resistant
10NN0547	Mo18W/B73 NIL-1067	819, 820, 821	M162W	7	105502314	132590605	heterozygous	resistant
10NN0547	Mo18W/B73 NIL-1067	822	M162W	8	16352911	21295611	homozygous	resistant
10NN0547	Mo18W/B73 NIL-1067	823	M162W	8	104171741	156201163	homozygous	resistant
10NN0549	Mo18W/B73 NIL-1073	824, 825, 826, 827, 828	M162W	5	22328377	170978078	homozygous	ns
10NN0549	Mo18W/B73 NIL-1073	829	M162W	9	151986542	156466161	homozygous	ns
10NN0551	Mo18W/B73 NIL-1089	830	M162W	3	181815692	217563552	homozygous	ns
10NN0553	Mo18W/B73 NIL-1127	831, 832	Mo17	10	12104305	80046149	heterozygous	ns
10NN0553	Mo18W/B73 NIL-1127		Mo17	10	97454595	100683137	heterozygous	ns
10NN0553	Mo18W/B73 NIL-1127	833	Mo17	10	132321909	138805218	heterozygous	ns
10NN0553	Mo18W/B73 NIL-1127	834	Mo17	10	138805218	150146791	homozygous	ns
10NN0555	Mo18W/B73 NIL-1146	835	M162W	7	134703402	136332897	homozygous	ns
10NN0555	Mo18W/B73 NIL-1146	835	M162W	7	138371971	152448455	homozygous	ns
10NN0555	Mo18W/B73 NIL-1146	836	M162W	8	20526406	23426927	homozygous	ns
10NN0557	Mo18W/B73 NIL-1149	837, 838, 839	Tzi8	4	67024971	170712499	heterozygous	ns
10NN0557	Mo18W/B73 NIL-1149	840	Tzi8	10	127258438	133713986	heterozygous	ns
10NN0559	Mo18W/B73 NIL-1149	841	Mo17	6	97946476	106836229	homozygous	ns
10NN0561	M162W/B73 NIL-1023	658, 659, 660, 661	Mo17	1	73341180	174296962	homozygous	ns
10NN0561	M162W/B73 NIL-1023		Mo17	6	2720479	5146060	homozygous	ns
10NN0563	M162W/B73 NIL-1026	662	Mo17	2	28117469	30997607	homozygous	susceptible
10NN0563	M162W/B73 NIL-1026	663, 664, 665	Mo17	2	204077137	228940723	homozygous	susceptible
10NN0565	M162W/B73 NIL-1042		Tzi8	2	9372433	11589096	homozygous	ns
10NN0565	M162W/B73 NIL-1042	666	Tzi8	2	229586819	236974112	heterozygous	ns
10NN0565	M162W/B73 NIL-1042	667, 668, 669, 670, 671, 672	Tzi8	3	23012358	128638697	homozygous	ns
10NN0567	M162W/B73 NIL-1057		M162W	2	4102376	7040784	homozygous	ns
10NN0569	M162W/B73 NIL-1058		Mo17	3	154974554	157088024	homozygous	ns
10NN0569	M162W/B73 NIL-1058	673	Mo17	3	205375229	213607647	heterozygous	ns
10NN0569	M162W/B73 NIL-1058	674	Mo17	4	82662689	91395783	heterozygous	ns
10NN0569	M162W/B73 NIL-1058		Mo17	6	134852274	137029884	heterozygous	ns
10NN0569	M162W/B73 NIL-1058		Mo17	8	123601847	132675226	heterozygous	ns
10NN0571	M162W/B73 NIL-1063	675	M162W	3	208768031	211147384	heterozygous	ns
10NN0573	M162W/B73 NIL-1068	676	Mo17	1	196201034	202445843	homozygous	resistant
10NN0573	M162W/B73 NIL-1068	676	Mo17	1	202445843	208315950	heterozygous	resistant
10NN0573	M162W/B73 NIL-1068	676	Mo17	1	208315950	213270638	homozygous	resistant
10NN0573	M162W/B73 NIL-1068		Mo17	1	213270638	218716952	heterozygous	resistant
10NN0573	M162W/B73 NIL-1068	677	Mo17	2	140748672	150700104	heterozygous	resistant
10NN0573	M162W/B73 NIL-1068	678, 679	Mo17	2	150700104	176020100	homozygous	resistant
10NN0573	M162W/B73 NIL-1068	680	Mo17	6	130409980	155590529	homozygous	resistant
10NN0575	M162W/B73 NIL-1089	681	Mo17	2	219731394	224064542	homozygous	ns
10NN0575	M162W/B73 NIL-1089	682, 683, 684, 685	Mo17	4	140878392	188518875	homozygous	ns
10NN0577	M162W/B73 NIL-1094	686	Mo17	1	18837982	26495997	homozygous	ns
10NN0577	M162W/B73 NIL-1094		Mo17	5	206072796	210632006	heterozygous	ns
10NN0577	M162W/B73 NIL-1094	687	Mo17	6	151453127	163174808	homozygous	ns
10NN0579	M162W/B73 NIL-1109	688, 689, 690, 691, 692, 693	Mo17	3	7123327	132330274	homozygous	ns
10NN0579	M162W/B73 NIL-1109		Mo17	4	3110188	5001686	heterozygous	ns
10NN0581	M162W/B73 NIL-1110	694	Mo17	2	11196792	15976388	homozygous	ns
10NN0581	M162W/B73 NIL-1110	695, 696	Mo17	2	109577599	148878928	homozygous	ns
10NN0581	M162W/B73 NIL-1110		Mo17	8	16775855	19672764	heterozygous	ns
10NN0581	M162W/B73 NIL-1110	697, 698, 699, 700	Mo17	8	19672764	97939977	homozygous	ns
10NN0581	M162W/B73 NIL-1110	701	Mo17	8	117638556	124358801	homozygous	ns
10NN0583	M162W/B73 NIL-1112		Mo17	2	11205474	15996310	heterozygous	ns
10NN0583	M162W/B73 NIL-1112	702	Mo17	2	27762936	44261056	homozygous	ns
10NN0583	M162W/B73 NIL-1112	703, 704, 705, 706	Mo17	8	19672764	96628130	homozygous	ns
10NN0583	M162W/B73 NIL-1112	707	Mo17	8	117638556	124797091	homozygous	ns
10NN0583	M162W/B73 NIL-1112	707	Mo17	8	124797091	133145154	heterozygous	ns
10NN0585	M162W/B73 NIL-1160	708	Mo17	1	10827014	17493955	homozygous	ns
10NN0585	M162W/B73 NIL-1160	709	Mo17	2	41248005	51240713	homozygous	ns
10NN0585	M162W/B73 NIL-1160		Mo17	4	189276293	191538458	homozygous	ns
10NN0587	M162W/B73 NIL-1177		Tzi8	4	20054548	25211311	heterozygous	ns
10NN0587	M162W/B73 NIL-1177	710, 711	Tzi8	4	28350977	136038749	heterozygous	ns
10NN0587	M162W/B73 NIL-1177	712, 713, 714	Tzi8	7	108846105	153839880	homozygous	ns
10NN0589	M162W/B73 NIL-1198	715	Mo17	6	159694071	166623780	homozygous	susceptible
10NN0591	M162W/B73 NIL-1199		Mo17	1	290472158	292526398	heterozygous	susceptible
10NN0591	M162W/B73 NIL-1199	716	Mo17	5	16091782	19918606	homozygous	susceptible
10NN0591	M162W/B73 NIL-1199	717	Mo17	5	184158560	199786586	homozygous	susceptible
10NN0593	M162W/B73 NIL-1209	718	Tzi8	3	217462913	232019477	heterozygous	ns
10NN0593	M162W/B73 NIL-1209		Tzi8	6	151580123	153766362	heterozygous	ns
10NN0595	M162W/B73 NIL-1211		M162W	8	71061492	71632119	homozygous	ns
10NN0597	M162W/B73 NIL-1218		M162W	4	11694498	13947501	homozygous	ns
10NN0597	M162W/B73 NIL-1218		M162W	9	5014347	7012804	homozygous	ns
10NN0599	M162W/B73 NIL-1221	719, 720	Mo18W	8	20231148	71391708	homozygous	ns
10NN0599	M162W/B73 NIL-1221	721	Mo18W	9	144885093	150225861	homozygous	ns
10NN0601	M162W/B73 NIL-1232		Mo18W	1	222304681	224103435	homozygous	ns
10NN0601	M162W/B73 NIL-1232	722, 723	Mo18W	7	134082669	148148288	homozygous	ns
10NN0603	M162W/B73 NIL-1233		Mo18W	7	6986327	11665092	heterozygous	susceptible
10NN0603	M162W/B73 NIL-1233	724	Mo18W	7	11665092	13835311	homozygous	susceptible
10NN0603	M162W/B73 NIL-1233	724	Mo18W	7	13835311	17144679	heterozygous	susceptible
10NN0603	M162W/B73 NIL-1233	724	Mo18W	7	17144679	24369514	homozygous	susceptible
10NN0603	M162W/B73 NIL-1233	724	Mo18W	7	24369514	26859904	heterozygous	susceptible
10NN0603	M162W/B73 NIL-1233	724	Mo18W	7	26859904	30659174	homozygous	susceptible
10NN0603	M162W/B73 NIL-1233	724	Mo18W	7	30659174	32735141	heterozygous	susceptible
10NN0603	M162W/B73 NIL-1233	724	Mo18W	7	32735141	86012708	homozygous	susceptible
10NN0603	M162W/B73 NIL-1233	724	Mo18W	7	86012708	92078719	heterozygous	susceptible
10NN0603	M162W/B73 NIL-1233	724	Mo18W	7	92078719	99640416	homozygous	susceptible
10NN0603	M162W/B73 NIL-1233	724	Mo18W	7	99640416	117365262	heterozygous	susceptible
10NN0603	M162W/B73 NIL-1233	725, 726	Mo18W	7	133178717	151195453	heterozygous	susceptible
10NN0605	M162W/B73 NIL-1254	727	Mo18W	7	134038725	146580676	heterozygous	ns
10NN0605	M162W/B73 NIL-1254	728	Mo18W	7	146580676	158160873	homozygous	ns
10NN0607	M162W/B73 NIL-1257	729	Mo18W	2	232482915	236974112	homozygous	ns
10NN0607	M162W/B73 NIL-1257		Mo18W	3	230016783	231993897	heterozygous	ns
10NN0609	M162W/B73 NIL-1265	730	Mo18W	7	171035998	173553893	homozygous	ns
10NN0611	M162W/B73 NIL-1282	731, 732	Mo18W	1	17886095	33884416	homozygous	ns
10NN0611	M162W/B73 NIL-1282	733, 734	Mo18W	6	0	6545683	homozygous	ns
10NN0613	Mo18W/B73 NIL-1018	842	Mo18W	1	198233280	207708949	homozygous	ns
10NN0613	Mo18W/B73 NIL-1018	843	Mo18W	3	191080405	206600907	homozygous	ns
10NN0615	Mo18W/B73 NIL-1028	844	Mo18W	9	0	8429219	homozygous	ns
10NN0617	Mo18W/B73 NIL-1041	845	Mo18W	3	219186542	229090811	heterozygous	ns
10NN0617	Mo18W/B73 NIL-1041	846	Mo18W	7	165802579	176524195	homozygous	ns
10NN0619	Mo18W/B73 NIL-1076		Mo18W	1	83400312	85548022	heterozygous	ns
10NN0621	Mo18W/B73 NIL-1081	847	Mo18W	1	8019665	10848424	homozygous	ns
10NN0621	Mo18W/B73 NIL-1081	847	Mo18W	1	10848424	12986347	heterozygous	ns
10NN0621	Mo18W/B73 NIL-1081	848	Mo18W	4	181880033	237505293	homozygous	ns
10NN0623	Mo18W/B73 NIL-1093	849	Mo18W	5	168886851	206727435	homozygous	ns
10NN0625	Mo18W/B73 NIL-1097	850	Mo18W	3	7959279	13872412	homozygous	ns
10NN0625	Mo18W/B73 NIL-1097	851	Mo18W	6	143872659	153234052	heterozygous	ns
10NN0627	Mo18W/B73 NIL-1111	852	Mo18W	3	214859361	217572626	homozygous	ns
10NN0627	Mo18W/B73 NIL-1111		Mo18W	4	238428722	241402580	homozygous	ns
10NN0629	Mo18W/B73 NIL-1116	853	Mo18W	2	9414364	16644873	homozygous	ns
10NN0629	Mo18W/B73 NIL-1116	854	Mo18W	3	0	2624830	homozygous	ns
10NN0629	Mo18W/B73 NIL-1116	855	Mo18W	6	115366201	147023399	homozygous	ns
10NN0631	Mo18W/B73 NIL-1147	856	Mo18W	2	9426498	16540724	homozygous	ns
10NN0631	Mo18W/B73 NIL-1147	857	Mo18W	3	0	2626964	homozygous	ns
10NN0631	Mo18W/B73 NIL-1147	858	Mo18W	6	115366201	129437371	homozygous	ns
10NN0631	Mo18W/B73 NIL-1147	859	Mo18W	6	129437371	131760575	heterozygous	ns
10NN0631	Mo18W/B73 NIL-1147	860	Mo18W	6	131760575	147060437	homozygous	ns
10NN0633	Mo18W/B73 NIL-1160		Mo18W	2	12542327	14229827	heterozygous	ns
10NN0633	Mo18W/B73 NIL-1160		Mo18W	3	5777154	5879769	homozygous	ns
10NN0633	Mo18W/B73 NIL-1160		Mo18W	3	178044783	180042887	heterozygous	ns
10NN0633	Mo18W/B73 NIL-1160		Mo18W	6	131959200	141723416	heterozygous	ns
10NN0635	NC350/B73 NIL-1006	861	NC350	1	71205895	84538551	homozygous	ns
10NN0635	NC350/B73 NIL-1006	862	NC350	4	2404321	5041593	homozygous	ns
10NN0637	NC350/B73 NIL-1017	863	NC350	1	197194801	208989927	homozygous	susceptible
10NN0637	NC350/B73 NIL-1017	864	NC350	5	14653847	18675347	homozygous	susceptible
10NN0637	NC350/B73 NIL-1017	865	NC350	5	77434186	158821069	homozygous	susceptible
10NN0639	NC350/B73 NIL-1017	866	NC350	1	197194678	208824729	homozygous	ns
10NN0639	NC350/B73 NIL-1017	867	NC350	5	14514606	18700698	homozygous	ns
10NN0639	NC350/B73 NIL-1017	868	NC350	5	77747401	158822719	homozygous	ns
10NN0641	NC350/B73 NIL-1022	869	NC350	7	21421233	118509212	homozygous	ns
10NN0643	NC350/B73 NIL-1054	870	NC350	4	11827538	17505688	homozygous	ns
10NN0645	NC350/B73 NIL-1075	871	NC350	8	17060708	160087090	homozygous	ns
10NN0647	NC350/B73 NIL-1086	872	NC350	3	142250190	161565652	homozygous	susceptible
10NN0649	NC350/B73 NIL-1090	873	NC350	1	294096863	301331020	homozygous	ns
10NN0649	NC350/B73 NIL-1090	874	NC350	5	51667851	56374930	homozygous	ns
10NN0651	NC350/B73 NIL-1104	875	NC350	1	2942391	6433360	homozygous	ns
10NN0651	NC350/B73 NIL-1104	876	NC350	3	218188236	225878690	homozygous	ns
10NN0651	NC350/B73 NIL-1104	877	NC350	5	15446414	18541356	homozygous	ns
10NN0653	NC350/B73 NIL-1146	878	NC350	6	103321530	150836354	homozygous	resistant
10NN0655	NC350/B73 NIL-1153	879	NC358	2	14327548	16917903	homozygous	ns
10NN0655	NC350/B73 NIL-1153	880	NC358	4	27980693	31577556	heterozygous	ns
10NN0655	NC350/B73 NIL-1153	880	NC358	4	31577556	37101030	homozygous	ns
10NN0655	NC350/B73 NIL-1153	881	NC358	5	21351302	51667851	homozygous	ns
10NN0655	NC350/B73 NIL-1153	882	NC358	6	160332595	169082784	homozygous	ns
10NN0657	NC350/B73 NIL-1156	883, 884	NC358	4	146362427	157968567	homozygous	ns
10NN0657	NC350/B73 NIL-1156	885	NC358	5	180900630	211074722	homozygous	ns
10NN0657	NC350/B73 NIL-1156	886	NC358	9	147342498	147983624	heterozygous	ns
10NN0657	NC350/B73 NIL-1156		NC358	9	147983822	150716195	homozygous	ns
10NN0659	NC350/B73 NIL-1170		NC350	1	50438257	52256600	heterozygous	ns
10NN0659	NC350/B73 NIL-1170	887	NC350	2	7744383	12196041	homozygous	ns
10NN0659	NC350/B73 NIL-1170	888	NC350	5	198819685	206727435	homozygous	ns
10NN0661	NC350/B73 NIL-1194	889	NC350	2	207977772	233803225	homozygous	resistant
10NN0661	NC350/B73 NIL-1194	890	NC350	3	12545699	25217062	homozygous	resistant
10NN0663	NC350/B73 NIL-1195	891	NC350	2	205035174	233803225	homozygous	ns
10NN0663	NC350/B73 NIL-1195	892	NC350	3	31458824	37674480	homozygous	ns
10NN0663	NC350/B73 NIL-1195	893	NC350	9	127505009	133939620	heterozygous	ns
10NN0663	NC350/B73 NIL-1195	894	NC350	9	133939620	137787017	homozygous	ns
10NN0665	NC350/B73 NIL-1195	895	NC350	2	199293407	215411765	homozygous	ns
10NN0665	NC350/B73 NIL-1195	895	NC350	2	215411765	217277960	heterozygous	ns
10NN0665	NC350/B73 NIL-1195	895	NC350	2	217277960	219192824	homozygous	ns
10NN0665	NC350/B73 NIL-1195	896	NC350	2	219192824	221566430	heterozygous	ns
10NN0665	NC350/B73 NIL-1195	897	NC350	2	221566430	224064542	homozygous	ns
10NN0665	NC350/B73 NIL-1195	898	NC350	2	224064542	229021339	heterozygous	ns
10NN0665	NC350/B73 NIL-1195	899	NC350	2	229021339	233765033	homozygous	ns
10NN0665	NC350/B73 NIL-1195	900	NC350	3	13723911	31458824	heterozygous	ns
10NN0665	NC350/B73 NIL-1195	901	NC350	3	31458824	37829185	homozygous	ns
10NN0665	NC350/B73 NIL-1195	902	NC350	9	133941248	137787017	homozygous	ns
10NN0667	NC350/B73 NIL-1202	903	NC350	7	169203231	176524195	homozygous	ns
10NN0667	NC350/B73 NIL-1202	904	NC350	9	107492224	111116694	heterozygous	ns
10NN0667	NC350/B73 NIL-1202	905	NC350	9	138627426	142918975	homozygous	ns
10NN0669	NC350/B73 NIL-1220		NC350	1	289566282	293138850	heterozygous	ns
10NN0669	NC350/B73 NIL-1220	906	NC350	3	199745907	204466111	heterozygous	ns
10NN0669	NC350/B73 NIL-1220	907	NC350	6	162999667	169082784	heterozygous	ns
10NN0671	NC350/B73 NIL-1233	908	NC350	1	17640101	51318356	homozygous	ns
10NN0673	NC350/B73 NIL-1245		NC350	2	234802087	236974112	homozygous	ns
10NN0673	NC350/B73 NIL-1245	909	NC350	3	7081859	126445639	homozygous	ns
10NN0673	NC350/B73 NIL-1245	910	NC350	3	126445639	147515930	heterozygous	ns
10NN0673	NC350/B73 NIL-1245	911	NC350	4	200185395	229337654	homozygous	ns
10NN0675	NC350/B73 NIL-1261	912	NC350	2	222967956	233428028	heterozygous	ns
10NN0675	NC350/B73 NIL-1261	913	NC350	6	145075574	161243424	homozygous	ns
10NN0677	NC350/B73 NIL-1278	914	NC350	2	205035968	215551642	homozygous	susceptible
10NN0677	NC350/B73 NIL-1278	915	NC350	6	0	96880137	homozygous	susceptible
10NN0679	NC350/B73 NIL-1282	916	NC350	4	21655590	163775929	homozygous	ns
10NN0681	NC358/B73 NIL-1022	917	NC358	8	18214357	159789622	homozygous	resistant
10NN0681	NC358/B73 NIL-1022	918	NC358	9	137634098	143000994	homozygous	resistant
10NN0683	NC358/B73 NIL-1033	919	NC358	7	128116811	157479793	homozygous	ns
10NN0685	NC358/B73 NIL-1041	920	NC358	1	282530820	287296361	homozygous	ns
10NN0685	NC358/B73 NIL-1041		NC358	5	0	1545880	heterozygous	ns
10NN0685	NC358/B73 NIL-1041	921	NC358	5	36593775	74910595	heterozygous	ns
10NN0687	NC358/B73 NIL-1042	922	NC358	5	31858455	74912704	homozygous	susceptible
10NN0695	NC358/B73 NIL-1075	923	NC358	1	8631667	29359859	homozygous	ns
10NN0699	NC358/B73 NIL-1079	924	NC358	6	161833452	164558115	homozygous	susceptible
10NN0699	NC358/B73 NIL-1079	925	NC358	10	4911289	10536997	homozygous	susceptible
10NN0701	NC358/B73 NIL-1080	926	NC358	1	295724411	300800382	homozygous	ns
10NN0703	NC358/B73 NIL-1100	927	NC358	10	140049264	146291490	heterozygous	susceptible
10NN0709	NC358/B73 NIL-1122	928	NC358	2	222271401	229187739	homozygous	ns
10NN0709	NC358/B73 NIL-1122	929	NC358	3	210522190	215475840	heterozygous	ns
10NN0709	NC358/B73 NIL-1122	930	NC358	3	215475840	220747581	homozygous	ns
10NN0711	NC358/B73 NIL-1150	931	NC358	7	9204391	13578990	homozygous	ns
10NN0711	NC358/B73 NIL-1150	932	NC358	9	115672270	131532904	heterozygous	ns
10NN0717	NC358/B73 NIL-1166		Oh43	2	14719143	16546604	homozygous	ns
10NN0717	NC358/B73 NIL-1166	933	Oh43	3	122493752	127501036	homozygous	ns
10NN0717	NC358/B73 NIL-1166	934	Oh43	3	146647302	160576287	homozygous	ns
10NN0717	NC358/B73 NIL-1166		Oh43	3	167434521	172448391	heterozygous	ns
10NN0723	NC358/B73 NIL-1204	935	Oh43	4	18005722	21584469	homozygous	ns
10NN0723	NC358/B73 NIL-1204	936	Oh43	9	0	6300238	homozygous	ns
10NN0725	NC358/B73 NIL-1217	937	NC358	1	71129348	195185930	homozygous	ns
10NN0725	NC358/B73 NIL-1217	938	NC358	7	5338360	9252416	homozygous	ns
10NN0727	NC358/B73 NIL-1231	939	NC358	6	117598548	140784094	homozygous	ns
10NN0727	NC358/B73 NIL-1231	940	NC358	7	1569346	5093321	homozygous	ns
10NN0731	NC358/B73 NIL-1239	941	NC358	4	10224275	14680119	homozygous	ns
10NN0735	NC358/B73 NIL-1248	942	NC358	1	45425091	53069023	homozygous	ns
10NN0735	NC358/B73 NIL-1248	943	NC358	1	206709832	211326114	heterozygous	ns
10NN0737	Oh43/B73 NIL-1017	944	Oh43	6	138355859	144705810	homozygous	ns
10NN0737	Oh43/B73 NIL-1017	945	Oh43	9	3137176	8972393	homozygous	ns
10NN0739	Oh43/B73 NIL-1018		Mo17	6	154893510	156552473	heterozygous	ns
10NN0739	Oh43/B73 NIL-1018	946, 947, 948	Mo17	9	3137176	8957176	homozygous	ns
10NN0741	Oh43/B73 NIL-1047	949	Oh43	7	19436395	124222478	homozygous	ns
10NN0743	Oh43/B73 NIL-1050	950	Oh43	2	189721722	193575977	heterozygous	ns
10NN0743	Oh43/B73 NIL-1050	951	Oh43	7	40379321	108481565	homozygous	ns
10NN0745	Oh43/B73 NIL-1053	952	Oh43	5	41360205	143672119	homozygous	ns
10NN0745	Oh43/B73 NIL-1053	953	Oh43	10	418637	1731409	homozygous	ns
10NN0747	Oh43/B73 NIL-1059	954	Oh43	1	21703406	39140936	homozygous	ns
10NN0747	Oh43/B73 NIL-1059	955	Oh43	1	39140936	43768922	heterozygous	ns
10NN0747	Oh43/B73 NIL-1059	956	Oh43	1	43768922	47484286	homozygous	ns
10NN0747	Oh43/B73 NIL-1059	957	Oh43	1	47484286	53162339	heterozygous	ns
10NN0749	Oh43/B73 NIL-1065	958	Tx303	2	12195946	15475273	homozygous	susceptible
10NN0749	Oh43/B73 NIL-1065	959	Tx303	2	44260641	70343087	heterozygous	susceptible
10NN0749	Oh43/B73 NIL-1065	959, 960, 961, 962, 963, 964	Tx303	2	70343087	176009586	homozygous	susceptible
10NN0749	Oh43/B73 NIL-1065	965	Tx303	2	176009586	180170669	heterozygous	susceptible
10NN0749	Oh43/B73 NIL-1065	965	Tx303	2	183560531	186533942	heterozygous	susceptible
10NN0749	Oh43/B73 NIL-1065	966, 967, 968	Tx303	4	28329928	151714535	homozygous	susceptible
10NN0749	Oh43/B73 NIL-1065	968	Tx303	4	151714535	156513201	heterozygous	susceptible
10NN0749	Oh43/B73 NIL-1065		Tx303	7	0	2177221	homozygous	susceptible
10NN0751	Oh43/B73 NIL-1106'	969	Oh43	5	175592034	180900907	heterozygous	susceptible
10NN0751	Oh43/B73 NIL-1106'	970	Oh43	5	183608451	196678672	homozygous	susceptible
10NN0751	Oh43/B73 NIL-1106'	971	Oh43	5	196678672	200679255	heterozygous	susceptible
10NN0753	Oh43/B73 NIL-1132	972	Oh43	1	198393110	205914421	homozygous	susceptible
10NN0753	Oh43/B73 NIL-1132		Oh43	2	3562846	5513874	heterozygous	susceptible
10NN0753	Oh43/B73 NIL-1132	973	Oh43	2	164667964	168701764	homozygous	susceptible
10NN0753	Oh43/B73 NIL-1132	974	Oh43	2	170556371	180156802	heterozygous	susceptible
10NN0753	Oh43/B73 NIL-1132	975	Oh43	2	180156802	192439341	homozygous	susceptible
10NN0755	Oh43/B73 NIL-1140	976	Tx303	2	14206450	20018052	homozygous	susceptible
10NN0755	Oh43/B73 NIL-1140	977	Tx303	2	20018052	36824479	heterozygous	susceptible
10NN0755	Oh43/B73 NIL-1140	978	Tx303	8	3298665	8100322	homozygous	susceptible
10NN0755	Oh43/B73 NIL-1140	979	Tx303	8	156260697	168117034	homozygous	susceptible
10NN0757	OH43/B73 NIL-1140	980	Tx303	2	14108062	19920921	homozygous	ns
10NN0757	OH43/B73 NIL-1140	981	Tx303	2	19920921	29834342	heterozygous	ns
10NN0757	OH43/B73 NIL-1140	982	Tx303	8	3348197	8100322	homozygous	ns
10NN0757	OH43/B73 NIL-1140	983	Tx303	8	156260697	168117034	homozygous	ns
10NN0759	Oh43/B73 NIL-1165	987	Oh43	2	217345228	219019264	homozygous	ns
10NN0759	Oh43/B73 NIL-1165	987	Oh43	2	219019264	223410004	heterozygous	ns
10NN0759	Oh43/B73 NIL-1165	988	Oh43	2	223410004	236974123	homozygous	ns
10NN0761	Oh43/B73 NIL-1176	989	Oh43	5	0	7134513	homozygous	susceptible
10NN0761	Oh43/B73 NIL-1176	990	Oh43	5	10279108	174305820	homozygous	susceptible
10NN0761	Oh43/B73 NIL-1176	991	Oh43	5	174305820	180900907	heterozygous	susceptible
10NN0761	Oh43/B73 NIL-1176	992	Oh43	5	183608451	196678672	homozygous	susceptible
10NN0761	Oh43/B73 NIL-1176	993	Oh43	5	196678672	199209646	heterozygous	susceptible
10NN0763	Oh43/B73 NIL-1179	994	Oh43	2	19145297	44387306	homozygous	ns
10NN0763	Oh43/B73 NIL-1179	995	Oh43	2	119909473	131348996	homozygous	ns
10NN0763	Oh43/B73 NIL-1179	996	Oh43	2	131348996	154610272	heterozygous	ns
10NN0763	Oh43/B73 NIL-1179	997	Oh43	2	206539744	212527472	heterozygous	ns
10NN0763	Oh43/B73 NIL-1179	998	Oh43	2	212527472	216756682	homozygous	ns
10NN0765	Oh43/B73 NIL-1184	999	Oh43	1	280219279	285390969	homozygous	susceptible
10NN0765	Oh43/B73 NIL-1184	1000	Oh43	1	285390969	293574140	heterozygous	susceptible
10NN0765	Oh43/B73 NIL-1184	1000	Oh43	1	293574140	300994674	homozygous	susceptible
10NN0765	Oh43/B73 NIL-1184		Oh43	2	235063833	236974123	homozygous	susceptible
10NN0767	Oh43/B73 NIL-1195	1001	Oh43	1	59469253	80965217	heterozygous	ns
10NN0767	Oh43/B73 NIL-1195	1002	Oh43	3	12526502	26195027	heterozygous	ns
10NN0767	Oh43/B73 NIL-1195	1003	Oh43	3	35892054	41243956	heterozygous	ns
10NN0767	Oh43/B73 NIL-1195	1003	Oh43	3	43407776	49249032	heterozygous	ns
10NN0767	Oh43/B73 NIL-1195	1004	Oh43	3	54472075	85714978	heterozygous	ns
10NN0767	Oh43/B73 NIL-1195	1005	Oh43	3	89427671	97369765	heterozygous	ns
10NN0767	Oh43/B73 NIL-1195	1006	Oh43	3	108052361	115358500	heterozygous	ns
10NN0767	Oh43/B73 NIL-1195		Oh43	3	121560308	123402440	heterozygous	ns
10NN0767	Oh43/B73 NIL-1195	1007	Oh43	3	127050200	133173392	heterozygous	ns
10NN0767	Oh43/B73 NIL-1195	1008	Oh43	7	0	2874934	heterozygous	ns
10NN0769	Oh43/B73 NIL-1230		Mo18W	2	2113538	4269258	heterozygous	ns
10NN0769	Oh43/B73 NIL-1230	1009	Mo18W	4	17234585	26805493	heterozygous	ns
10NN0769	Oh43/B73 NIL-1230	1010	Mo18W	8	79127328	88008944	homozygous	ns
10NN0769	Oh43/B73 NIL-1230	1010	Mo18W	8	90258880	105321043	heterozygous	ns
10NN0769	Oh43/B73 NIL-1230	1011	Mo18W	8	109936212	149045182	heterozygous	ns
10NN0769	Oh43/B73 NIL-1230	1012	Mo18W	8	149045182	153028357	homozygous	ns
10NN0769	Oh43/B73 NIL-1230	1013	Mo18W	8	155894882	158986612	homozygous	ns
10NN0769	Oh43/B73 NIL-1230	1013	Mo18W	8	158986612	161475000	heterozygous	ns
10NN0771	Oh43/B73 NIL-1237	1014	Oh43	1	265521680	280219279	homozygous	ns
10NN0773	Oh43/B73 NIL-1245	1015	Mo17	1	2470218	5055955	heterozygous	ns
10NN0773	Oh43/B73 NIL-1245	1015	Mo17	1	5055955	14105365	homozygous	ns
10NN0773	Oh43/B73 NIL-1245		Mo17	3	210583263	213790552	homozygous	ns
10NN0773	Oh43/B73 NIL-1245	1016	Mo17	6	158298040	165528346	homozygous	ns
10NN0773	Oh43/B73 NIL-1245	1016	Mo17	6	165528346	169102724	heterozygous	ns
10NN0775	Oh43/B73 NIL-1246		Mo17	1	2469093	5533207	heterozygous	ns
10NN0775	Oh43/B73 NIL-1246		Mo17	1	289847067	291669642	heterozygous	ns
10NN0775	Oh43/B73 NIL-1246	1017	Mo17	3	12783456	31481726	heterozygous	ns
10NN0775	Oh43/B73 NIL-1246		Mo17	3	201294485	203978978	heterozygous	ns
10NN0775	Oh43/B73 NIL-1246	1018	Mo17	3	210583263	215468300	heterozygous	ns
10NN0775	Oh43/B73 NIL-1246	1019	Mo17	5	15696879	18675372	heterozygous	ns
10NN0775	Oh43/B73 NIL-1246		Mo17	5	206072796	210632006	heterozygous	ns
10NN0775	Oh43/B73 NIL-1246	1020	Mo17	6	158368808	165528346	heterozygous	ns
10NN0775	Oh43/B73 NIL-1246	1021	Mo17	8	6026039	8862320	heterozygous	ns
10NN0775	Oh43/B73 NIL-1246	1022	Mo17	8	140007455	151334391	heterozygous	ns
10NN0777	Oh43/B73 NIL-1255	1023	Oh43	4	180446349	224308442	heterozygous	susceptible
10NN0779	Oh43/B73 NIL-1277	1024	Oh43	6	105425226	109251945	heterozygous	ns
10NN0781	Oh43/B73 NIL-1294	1025	Oh43	3	173520829	178152836	heterozygous	ns
10NN0781	Oh43/B73 NIL-1294	1026	Oh43	3	178152836	182129452	homozygous	ns
10NN0781	Oh43/B73 NIL-1294	1027	Oh43	3	182129452	194890563	heterozygous	ns
10NN0781	Oh43/B73 NIL-1294	1028	Oh43	4	159068195	167073970	homozygous	ns
10NN0783	Oh43/B73 NIL-1307		Tx303	1	192041680	206460773	heterozygous	ns
10NN0783	Oh43/B73 NIL-1307	1029	Tx303	1	216162465	253151544	heterozygous	ns
10NN0783	Oh43/B73 NIL-1307		Tx303	1	261571302	275224059	heterozygous	ns
10NN0783	Oh43/B73 NIL-1307	1030, 1031, 1032, 1033	Tx303	3	17829832	165862711	heterozygous	ns
10NN0783	Oh43/B73 NIL-1307	1034, 1035	Tx303	8	120963130	163654458	heterozygous	ns
10NN0785	Oh43/B73 NIL-1308	1036	Tx303	1	216162465	245902354	homozygous	ns
10NN0785	Oh43/B73 NIL-1308	1036	Tx303	1	245902354	253271782	heterozygous	ns
10NN0785	Oh43/B73 NIL-1308		Tx303	1	268431295	275037083	heterozygous	ns
10NN0785	Oh43/B73 NIL-1308	1037	Tx303	7	174537678	176524195	heterozygous	ns
10NN0785	Oh43/B73 NIL-1308	1038	Tx303	8	10084692	13370184	heterozygous	ns
10NN0785	Oh43/B73 NIL-1308	1039, 1040	Tx303	8	113570587	156260697	homozygous	ns
10NN0787	Oh43/B73 NIL-1319	1041	Oh43	2	12241572	14206450	heterozygous	ns
10NN0787	Oh43/B73 NIL-1319	1041	Oh43	2	14206450	27546472	homozygous	ns
10NN0787	Oh43/B73 NIL-1319	1042	Oh43	6	161213582	169102724	homozygous	ns
10NN0787	Oh43/B73 NIL-1319	1043	Oh43	8	8614010	11875074	heterozygous	ns
10NN0787	Oh43/B73 NIL-1319	1044	Oh43	9	76778891	94003433	homozygous	ns
10NN0787	Oh43/B73 NIL-1319	1045	Oh43	9	94003433	97790553	heterozygous	ns
10NN0787	Oh43/B73 NIL-1319	1046	Oh43	9	97790553	100678402	homozygous	ns
10NN0787	Oh43/B73 NIL-1319	1047	Oh43	9	100678402	108024757	heterozygous	ns
10NN0787	Oh43/B73 NIL-1319	1048	Oh43	9	108024757	114025675	homozygous	ns
10NN0787	Oh43/B73 NIL-1319	1049	Oh43	9	114025675	119425919	heterozygous	ns
10NN0789	Tx303/B73 NIL-1017	1050	Tx303	3	184366609	213397448	heterozygous	susceptible
10NN0789	Tx303/B73 NIL-1017		Tx303	5	182601283	184160110	heterozygous	susceptible
10NN0789	Tx303/B73 NIL-1017		Tx303	5	208350851	210557481	heterozygous	susceptible
10NN0789	Tx303/B73 NIL-1017	1051	Tx303	7	173743684	176524195	heterozygous	susceptible
10NN0791	Tx303/B73 NIL-1024	1052	Tx303	1	283455645	289785214	heterozygous	ns
10NN0791	Tx303/B73 NIL-1024	1052	Tx303	1	289785214	291726874	homozygous	ns
10NN0791	Tx303/B73 NIL-1024	1053	Tx303	5	14925764	18675347	homozygous	ns
10NN0791	Tx303/B73 NIL-1024	1054	Tx303	8	0	13331325	homozygous	ns
10NN0791	Tx303/B73 NIL-1024	1055	Tx303	8	138662416	151343492	homozygous	ns
10NN0793	Tx303/B73 NIL-1037	1056	Tx303	2	9445747	16934795	homozygous	ns
10NN0793	Tx303/B73 NIL-1037	1057	Tx303	9	133503946	139844430	homozygous	ns
10NN0793	Tx303/B73 NIL-1037	1058	Tx303	9	139844430	146230105	heterozygous	ns
10NN0795	Tx303/B73 NIL-1038	1059	Tx303	1	292533904	297790683	heterozygous	ns
10NN0795	Tx303/B73 NIL-1038		Tx303	1	297790683	301164139	homozygous	ns
10NN0795	Tx303/B73 NIL-1038		Tx303	5	208358675	211384173	heterozygous	ns
10NN0797	Tx303/B73 NIL-1040	1060	Tx303	1	188065423	208823048	homozygous	ns
10NN0797	Tx303/B73 NIL-1040		Tx303	2	13403972	15242184	heterozygous	ns
10NN0799	Tx303/B73 NIL-1047	1061	Mo17	7	118312040	152699638	homozygous	susceptible
10NN0799	Tx303/B73 NIL-1047	1062	Mo17	9	5467345	16318571	homozygous	susceptible
10NN0801	Tx303/B73 NIL-1062	1063	Tx303	2	51815944	144479730	homozygous	susceptible
10NN0801	Tx303/B73 NIL-1062	1064	Tx303	3	5287495	14408461	homozygous	susceptible
10NN0801	Tx303/B73 NIL-1062	1065	Tx303	3	14408461	21463292	heterozygous	susceptible
10NN0801	Tx303/B73 NIL-1062	1066	Tx303	4	11254264	34081547	homozygous	susceptible
10NN0803	Tx303/B73 NIL-1065	1067	Tx303	2	207698521	212527472	homozygous	susceptible
10NN0803	Tx303/B73 NIL-1065	1068	Tx303	10	6453362	14976129	homozygous	susceptible
10NN0803	Tx303/B73 NIL-1065	1069	Tx303	10	105818717	114869849	homozygous	susceptible
10NN0805	Tx303/B73 NIL-1083	1070	Tx303	8	152440624	159248954	heterozygous	ns
10NN0805	Tx303/B73 NIL-1083	1071	Tx303	8	159248954	164631084	homozygous	ns
10NN0805	Tx303/B73 NIL-1083	1072	Tx303	8	164631084	173930112	heterozygous	ns
10NN0805	Tx303/B73 NIL-1083	1072	Tx303	8	173930112	175508766	homozygous	ns
10NN0807	Tx303/B73 NIL-1084	1073	Tx303	5	168892942	199983864	homozygous	susceptible
10NN0807	Tx303/B73 NIL-1084	1074	Tx303	6	160015494	164562425	homozygous	susceptible
10NN0807	Tx303/B73 NIL-1084		Tx303	6	164562425	168066677	heterozygous	susceptible
10NN0809	Tx303/B73 NIL-1084	1075	Tx303	5	168892942	176990962	heterozygous	susceptible
10NN0809	Tx303/B73 NIL-1084	1076	Tx303	5	176990962	199983864	homozygous	susceptible
10NN0809	Tx303/B73 NIL-1084	1077	Tx303	6	160021838	164562425	homozygous	susceptible
10NN0811	Tx303/B73 NIL-1092		Tx303	5	199232534	201393448	heterozygous	susceptible
10NN0811	Tx303/B73 NIL-1092	1078	Tx303	5	204207566	213269294	homozygous	susceptible
10NN0811	Tx303/B73 NIL-1092	1079	Tx303	6	110800838	124841703	homozygous	susceptible
10NN0813	Tx303/B73 NIL-1099	1080	Mo17	3	208768031	225579411	homozygous	ns
10NN0813	Tx303/B73 NIL-1099	1081	Mo17	10	142792271	147311605	homozygous	ns
10NN0815	Tx303/B73 NIL-1127	1082	Tx303	3	19463935	42550574	homozygous	ns
10NN0815	Tx303/B73 NIL-1127	1083	Tx303	3	42550574	47448964	heterozygous	ns
10NN0815	Tx303/B73 NIL-1127	1084	Tx303	3	47448964	142736410	homozygous	ns
10NN0815	Tx303/B73 NIL-1127	1085	Tx303	3	142736410	148564082	heterozygous	ns
10NN0815	Tx303/B73 NIL-1127	1086	Tx303	3	148564082	169030149	homozygous	ns
10NN0815	Tx303/B73 NIL-1127	1087	Tx303	3	169030149	175533875	heterozygous	ns
10NN0815	Tx303/B73 NIL-1127		Tx303	5	0	1886300	homozygous	ns
10NN0815	Tx303/B73 NIL-1127	1088	Tx303	10	146584830	150092319	homozygous	ns
10NN0817	Tx303/B73 NIL-1130	1089	Tx303	1	23229352	48650708	homozygous	ns
10NN0817	Tx303/B73 NIL-1130	1090	Tx303	4	187991226	195196742	heterozygous	ns
10NN0819	Tx303/B73 NIL-1132	1091	Tx303	4	178590396	191355909	homozygous	ns
10NN0821	Tx303/B73 NIL-1144	1092	Tx303	1	75656314	199741294	homozygous	resistant
10NN0821	Tx303/B73 NIL-1144	1093	Tx303	3	13872412	17286027	heterozygous	resistant
10NN0823	Tx303/B73 NIL-1148	1094	Tx303	1	107288528	195282387	homozygous	resistant
10NN0823	Tx303/B73 NIL-1148	1095	Tx303	1	272837433	281275897	homozygous	resistant
10NN0823	Tx303/B73 NIL-1148	1096	Tx303	9	0	7106707	homozygous	resistant
10NN0825	Tx303/B73 NIL-1170	1097	Tx303	9	0	4507559	homozygous	ns
10NN0825	Tx303/B73 NIL-1170	1098	Tx303	9	4507559	8356307	heterozygous	ns
10NN0827	Tx303/B73 NIL-1179	1099	Tx303	3	199831479	204665028	heterozygous	ns
10NN0827	Tx303/B73 NIL-1179	1100	Tx303	4	154171760	172772017	heterozygous	ns
10NN0829	Tx303/B73 NIL-1185	1101	Tx303	5	22654723	69303600	homozygous	ns
10NN0831	Tx303/B73 NIL-1192	1102	Tx303	2	16870108	20123375	homozygous	ns
10NN0831	Tx303/B73 NIL-1192	1103	Tx303	2	20123375	23093281	heterozygous	ns
10NN0831	Tx303/B73 NIL-1192	1104	Tx303	2	23093281	29054922	homozygous	ns
10NN0831	Tx303/B73 NIL-1192	1105	Tx303	2	47364819	60874703	homozygous	ns
10NN0831	Tx303/B73 NIL-1192	1106	Tx303	7	6742868	118622471	homozygous	ns
10NN0831	Tx303/B73 NIL-1192	1107	Tx303	7	118622471	123595303	heterozygous	ns
10NN0831	Tx303/B73 NIL-1192	1108	Tx303	7	123595303	126214025	homozygous	ns
10NN0833	Tx303/B73 NIL-1208	1109	Tx303	1	230957070	253720178	homozygous	ns
10NN0833	Tx303/B73 NIL-1208	1110	Tx303	4	215105657	229343412	homozygous	ns
10NN0833	Tx303/B73 NIL-1208	1111	Tx303	6	149353994	156532447	heterozygous	ns
10NN0833	Tx303/B73 NIL-1208	1112	Tx303	6	161010787	168066677	homozygous	ns
10NN0833	Tx303/B73 NIL-1208	1113	Tx303	8	124226892	146607663	heterozygous	ns
10NN0835	Tx303/B73 NIL-1209	1114	Tx303	1	223773695	245791523	heterozygous	resistant
10NN0835	Tx303/B73 NIL-1209	1114	Tx303	1	245791523	248422356	homozygous	resistant
10NN0835	Tx303/B73 NIL-1209	1115	Tx303	8	20960128	146609889	homozygous	resistant
10NN0837	Tx303/B73 NIL-1209	1116	Tx303	4	215105657	229343412	homozygous	ns
10NN0837	Tx303/B73 NIL-1209	1117	Tx303	8	20960128	146609889	homozygous	ns
10NN0839	Tx303/B73 NIL-1221	1118	Tx303	3	176597722	181757359	homozygous	ns
10NN0839	Tx303/B73 NIL-1221	1119	Tx303	3	181757359	184313624	heterozygous	ns
10NN0839	Tx303/B73 NIL-1221		Tx303	3	230514357	232093960	heterozygous	ns
10NN0839	Tx303/B73 NIL-1221	1120	Tx303	4	181880044	195010454	homozygous	ns
10NN0839	Tx303/B73 NIL-1221	1121	Tx303	4	195010454	199417926	heterozygous	ns
10NN0839	Tx303/B73 NIL-1221	1122	Tx303	4	199417926	206077408	homozygous	ns
10NN0839	Tx303/B73 NIL-1221	1123	Tx303	6	162112192	164509720	homozygous	ns
10NN0841	Tx303/B73 NIL-1226		Tx303	1	299473432	301164139	homozygous	susceptible
10NN0841	Tx303/B73 NIL-1226	1124	Tx303	3	17259571	136165573	homozygous	susceptible
10NN0845	Tx303/B73 NIL-1240	1125	Tx303	7	21510052	125348547	homozygous	ns
10NN0845	Tx303/B73 NIL-1240	1126	Tx303	7	132184163	155745191	homozygous	ns
10NN0847	Tx303/B73 NIL-1241	1127	Tx303	5	195662029	200111779	homozygous	ns
10NN0849	Tx303/B73 NIL-1249	1128	Tx303	5	27861272	170023977	homozygous	ns
10NN0849	Tx303/B73 NIL-1249		Tx303	8	3348197	4960696	homozygous	ns
10NN0851	Tx303/B73 NIL-1257	1129	Tx303	4	231515445	234687666	homozygous	resistant
10NN0851	Tx303/B73 NIL-1257	1130	Tx303	8	120220617	166783947	homozygous	resistant
10NN0853	Tzi8/B73 NIL-1033	1131	Mo17	1	200559873	213097630	homozygous	ns
10NN0853	Tzi8/B73 NIL-1033	1132	Mo17	1	213097631	260514550	heterozygous	ns
10NN0853	Tzi8/B73 NIL-1033	1133	Mo17	1	260338487	278604692	homozygous	ns
10NN0853	Tzi8/B73 NIL-1033	1134	Mo17	1	278604708	279068425	heterozygous	ns
10NN0853	Tzi8/B73 NIL-1033	1135	Mo17	1	289566288	295191145	homozygous	ns
10NN0853	Tzi8/B73 NIL-1033		Mo17	3	4887502	6426536	heterozygous	ns
10NN0853	Tzi8/B73 NIL-1033	1136, 1137, 1138, 1139	Mo17	3	149554317	204153246	homozygous	ns
10NN0853	Tzi8/B73 NIL-1033	1140, 1141	Mo17	5	74730987	194560013	homozygous	ns
10NN0853	Tzi8/B73 NIL-1033	1142	Mo17	6	150081946	154131811	heterozygous	ns
10NN0853	Tzi8/B73 NIL-1033	1143	Mo17	7	2292978	5551690	heterozygous	ns
10NN0853	Tzi8/B73 NIL-1033	1144, 1145	Mo17	8	26350645	110477802	homozygous	ns
10NN0853	Tzi8/B73 NIL-1033	1146	Mo17	8	110477802	112760631	heterozygous	ns
10NN0853	Tzi8/B73 NIL-1033	1146	Mo17	8	112760631	118009048	homozygous	ns
10NN0853	Tzi8/B73 NIL-1033	1147	Mo17	8	169089052	175697699	homozygous	ns
10NN0853	Tzi8/B73 NIL-1033	1148	Mo17	10	10382272	11520178	homozygous	ns
10NN0853	Tzi8/B73 NIL-1033	1149	Mo17	10	16572296	34023166	heterozygous	ns
10NN0853	Tzi8/B73 NIL-1033	1150	Mo17	10	128991158	146172282	homozygous	ns
10NN0853	Tzi8/B73 NIL-1033		Mo17	10	147594373	148813148	homozygous	ns
10NN0855	Tzi8/B73 NIL-1041	1151	Tzi8	3	178049637	180507292	homozygous	ns
10NN0855	Tzi8/B73 NIL-1041	1152	Tzi8	3	202561389	220845286	homozygous	ns
10NN0857	Tzi8/B73 NIL-1051	1153	Tzi8	3	165414021	171779644	homozygous	ns
10NN0857	Tzi8/B73 NIL-1051	1154	Tzi8	8	18444074	38488717	homozygous	ns
10NN0857	Tzi8/B73 NIL-1051	1155	Tzi8	8	38488717	61519784	heterozygous	ns
10NN0857	Tzi8/B73 NIL-1051	1156	Tzi8	8	61519784	146060103	homozygous	ns
10NN0857	Tzi8/B73 NIL-1051	1157	Tzi8	8	146060103	152972564	heterozygous	ns
10NN0859	Tzi8/B73 NIL-1069	1158	CML228	1	29515633	88339856	heterozygous	resistant
10NN0859	Tzi8/B73 NIL-1069	1158, 1159	CML228	1	88339856	91267549	homozygous	resistant
10NN0859	Tzi8/B73 NIL-1069	1159, 1160, 1161, 1162, 1163	CML228	1	91267549	191893670	heterozygous	resistant
10NN0859	Tzi8/B73 NIL-1069	1164	CML228	1	220075502	258364654	heterozygous	resistant
10NN0859	Tzi8/B73 NIL-1069	1165	CML228	5	182130875	185627955	homozygous	resistant
10NN0859	Tzi8/B73 NIL-1069	1166	CML228	6	154938624	169102724	heterozygous	resistant
10NN0859	Tzi8/B73 NIL-1069	1167	CML228	7	164751770	170257554	homozygous	resistant
10NN0859	Tzi8/B73 NIL-1069	1167	CML228	7	170257554	176521445	heterozygous	resistant
10NN0861	Tzi8/B73 NIL-1088	1168	Tzi8	1	10844749	15071030	homozygous	ns
10NN0861	Tzi8/B73 NIL-1088	1168	Tzi8	1	15071030	16799917	heterozygous	ns
10NN0861	Tzi8/B73 NIL-1088	1168	Tzi8	1	16799917	21713905	homozygous	ns
10NN0861	Tzi8/B73 NIL-1088	1169	Tzi8	1	292078092	295888150	homozygous	ns
10NN0863	Tzi8/B73 NIL-1092	1170	Tzi8	1	21703406	24196098	heterozygous	ns
10NN0863	Tzi8/B73 NIL-1092	1170	Tzi8	1	24196098	34935047	homozygous	ns
10NN0863	Tzi8/B73 NIL-1092	1170	Tzi8	1	34935047	36973119	heterozygous	ns
10NN0863	Tzi8/B73 NIL-1092	1170	Tzi8	1	36973119	45403421	homozygous	ns
10NN0863	Tzi8/B73 NIL-1092	1171	Tzi8	1	45403421	48642297	heterozygous	ns
10NN0863	Tzi8/B73 NIL-1092	1172	Tzi8	1	48642297	52922926	homozygous	ns
10NN0863	Tzi8/B73 NIL-1092		Tzi8	5	0	1539612	homozygous	ns
10NN0865	Tzi8/B73 NIL-1132	1173	Tzi8	2	163825081	178616652	heterozygous	ns
10NN0865	Tzi8/B73 NIL-1132	1174	Tzi8	6	102755820	128725802	homozygous	ns
10NN0867	Tzi8/B73 NIL-1135		Tzi8	3	19667468	21266634	homozygous	resistant
10NN0867	Tzi8/B73 NIL-1135	1175	Tzi8	4	192653846	231138024	homozygous	resistant
10NN0867	Tzi8/B73 NIL-1135	1176	Tzi8	6	84383326	154135360	homozygous	resistant
10NN0867	Tzi8/B73 NIL-1135	1177	Tzi8	8	111193031	156371227	homozygous	resistant
10NN0869	Tzi8/B73 NIL-1143	1178	Tzi8	1	207646652	213538588	homozygous	ns
10NN0869	Tzi8/B73 NIL-1143	1179	Tzi8	5	31445264	82550997	homozygous	ns
10NN0869	Tzi8/B73 NIL-1143	1180	Tzi8	5	82550997	100686088	heterozygous	ns
10NN0869	Tzi8/B73 NIL-1143	1181	Tzi8	5	111998749	186945253	homozygous	ns
10NN0871	Tzi8/B73 NIL-1147	1182	Tzi8	1	176066483	180342410	heterozygous	ns
10NN0871	Tzi8/B73 NIL-1147	1183	Tzi8	7	3009839	19324354	homozygous	ns
10NN0871	Tzi8/B73 NIL-1147	1184	Tzi8	7	19324354	30322019	heterozygous	ns
10NN0871	Tzi8/B73 NIL-1147	1185	Tzi8	7	30322019	121574393	homozygous	ns
10NN0871	Tzi8/B73 NIL-1147	1186	Tzi8	7	121574393	125835944	heterozygous	ns
10NN0871	Tzi8/B73 NIL-1147	1187	Tzi8	7	125835944	129234780	homozygous	ns
10NN0873	Tzi8/B73 NIL-1152	1188	Tzi8	1	292103369	300994469	homozygous	susceptible
10NN0875	Tzi8/B73 NIL-1160		Tzi8	3	145364265	147288887	heterozygous	susceptible
10NN0875	Tzi8/B73 NIL-1160	1189	Tzi8	3	159810990	176260042	heterozygous	susceptible
10NN0875	Tzi8/B73 NIL-1160	1190	Tzi8	4	5967105	9759613	homozygous	susceptible
10NN0875	Tzi8/B73 NIL-1160	1191	Tzi8	6	165209207	169082784	homozygous	susceptible
10NN0875	Tzi8/B73 NIL-1160	1192	Tzi8	7	126340861	152007593	homozygous	susceptible
10NN0875	Tzi8/B73 NIL-1160	1193	Tzi8	9	26637554	31210328	heterozygous	susceptible
10NN0875	Tzi8/B73 NIL-1160	1194	Tzi8	9	99036891	108101488	homozygous	susceptible
10NN0877	Tzi8/B73 NIL-1169	1195	Tzi8	4	5969223	9759613	homozygous	susceptible
10NN0877	Tzi8/B73 NIL-1169	1196	Tzi8	4	9759613	13397520	heterozygous	susceptible
10NN0877	Tzi8/B73 NIL-1169	1197	Tzi8	7	146486986	152007593	homozygous	susceptible
10NN0879	Tzi8/B73 NIL-1172	1198	Tzi8	1	211263457	217638947	homozygous	ns
10NN0879	Tzi8/B73 NIL-1172	1199	Tzi8	1	226258111	240866326	homozygous	ns
10NN0879	Tzi8/B73 NIL-1172	1200	Tzi8	2	144983271	181540479	homozygous	ns
10NN0879	Tzi8/B73 NIL-1172	1201	Tzi8	4	7270397	14034147	homozygous	ns
10NN0881	Tzi8/B73 NIL-1189	1202	Tzi8	4	31069952	163681762	homozygous	ns
10NN0883	Tzi8/B73 NIL-1215	1203	Tzi8	3	9383076	20417430	homozygous	ns
10NN0883	Tzi8/B73 NIL-1215	1204	Tzi8	3	20417430	30054523	heterozygous	ns
10NN0885	Tzi8/B73 NIL-1218	1205	Tzi8	3	11210103	21424785	homozygous	ns
10NN0885	Tzi8/B73 NIL-1218	1206	Tzi8	3	144087906	183865492	homozygous	ns
10NN0885	Tzi8/B73 NIL-1218	1207	Tzi8	5	148305024	164983586	homozygous	ns
10NN0885	Tzi8/B73 NIL-1218	1208	Tzi8	10	147238401	150085842	heterozygous	ns
10NN0887	Tzi8/B73 NIL-1236	1209	Tzi8	1	179988345	183611752	heterozygous	ns
10NN0887	Tzi8/B73 NIL-1236	1210	Tzi8	1	257973163	270983189	homozygous	ns
10NN0887	Tzi8/B73 NIL-1236	1211	Tzi8	3	11056330	183865492	homozygous	ns
10NN0887	Tzi8/B73 NIL-1236	1212	Tzi8	9	0	2341239	homozygous	ns
10NN0887	Tzi8/B73 NIL-1236	1213	Tzi8	9	2341239	5467353	heterozygous	ns
10NN0889	Tzi8/B73 NIL-1280	1214	Tzi8	3	228998182	232019477	homozygous	ns
10NN0889	Tzi8/B73 NIL-1280	1215	Tzi8	5	9653611	77941755	homozygous	ns
10NN0889	Tzi8/B73 NIL-1280	1216	Tzi8	5	77941755	139038689	heterozygous	ns
10NN0889	Tzi8/B73 NIL-1280	1217	Tzi8	5	139038689	196142602	homozygous	ns
10NN0889	Tzi8/B73 NIL-1280	1218	Tzi8	10	138670225	141963049	homozygous	ns
10NN0891	Tzi8/B73 NIL-1282	1219	Tzi8	4	162936132	172792170	heterozygous	ns
10NN0891	Tzi8/B73 NIL-1282	1220	Tzi8	4	233994331	240843601	homozygous	ns
10NN0891	Tzi8/B73 NIL-1282	1221	Tzi8	5	188673090	200529163	homozygous	ns
10NN0891	Tzi8/B73 NIL-1282	1221	Tzi8	5	200529163	202420899	heterozygous	ns
10NN0891	Tzi8/B73 NIL-1282	1221	Tzi8	5	202420899	214528430	homozygous	ns
10NN0891	Tzi8/B73 NIL-1282	1222	Tzi8	8	0	10392692	homozygous	ns
10NN0891	Tzi8/B73 NIL-1282	1223	Tzi8	8	10392692	16219352	heterozygous	ns
10NN0891	Tzi8/B73 NIL-1282	1224	Tzi8	8	16219352	38488717	homozygous	ns
10NN0891	Tzi8/B73 NIL-1282	1225	Tzi8	8	38488717	61519784	heterozygous	ns
10NN0891	Tzi8/B73 NIL-1282	1226	Tzi8	8	61519784	95580207	homozygous	ns
10NN0893	Tzi8/B73 NIL-1304		Tzi8	1	38311667	40053680	heterozygous	ns
10NN0893	Tzi8/B73 NIL-1304	1227	Tzi8	1	40053680	45403421	homozygous	ns
10NN0893	Tzi8/B73 NIL-1304	1228	Tzi8	1	45403421	48642297	heterozygous	ns
10NN0893	Tzi8/B73 NIL-1304	1228	Tzi8	1	48642297	51170917	homozygous	ns
10NN0895	Tzi8/B73 NIL-1314	1229	Tzi8	1	273369723	292103369	homozygous	ns
10NN0895	Tzi8/B73 NIL-1314		Tzi8	2	235063737	236974112	heterozygous	ns
10NN0895	Tzi8/B73 NIL-1314	1230	Tzi8	5	18701733	22099805	homozygous	ns
10NN0895	Tzi8/B73 NIL-1314	1231	Tzi8	10	124094267	135135226	homozygous	ns
10NN0897	Tzi8/B73 NIL-1316	1232	Tzi8	1	296660662	300994469	homozygous	resistant
10NN0897	Tzi8/B73 NIL-1316	1233	Tzi8	2	223942610	234574584	homozygous	resistant
10NN0897	Tzi8/B73 NIL-1316	1234	Tzi8	6	107886218	147033612	homozygous	resistant
10NN0897	Tzi8/B73 NIL-1316	1235	Tzi8	6	149129913	153252266	homozygous	resistant
10NN0897	Tzi8/B73 NIL-1316	1236	Tzi8	6	153252266	158221230	heterozygous	resistant
10NN0899	Tzi8/B73 NIL-1321	1237	Tzi8	1	191442243	211478559	homozygous	susceptible
10NN0901	Tzi8/B73 NIL-1329	1238	Tzi8	2	206625233	229677214	homozygous	ns
10NN0903	Tzi8/B73 NIL-1001	1239	Tzi8	3	219689164	224165549	heterozygous	ns
10NN0903	Tzi8/B73 NIL-1001	1240	Tzi8	9	136787053	140846401	heterozygous	ns
10NN0905	Tzi8/B73 NIL-1213	1241	Tzi8	1	191442243	211478559	homozygous	susceptible
† refers to introgression referenced in Table S3
